# Supplementary material for: SARS-CoV-2 nsp16 is regulated by host E3 ubiquitin ligases, UBR5 and MARCHF7
Source: eLife journal article supplement (doi:10.7554/elife.102277), 2024-12-24
Supplement: fig1-data3 [file elife-102277-fig1-data3-v1.zip]

## Sheet: Fig.1
Fig.1A		protein gray value	tubulin gray value	protein gray value	tubulin gray value	protein gray value	tubulin gray value	protein/tubulin	protein/tubulin	protein/tubulin	MG132/DMSO	MG132/DMSO	MG132/DMSO
DMSO	nsp1	12784	49268	15096	48868	12274	48967	0.259479	0.308914	0.250659
MG132	nsp1	12604	45395	14024	45378	12734	44957	0.277652	0.309048	0.283248	1.07004	1.00044	1.13002
DMSO	nsp2	41650	21522	44319	22034	46087	19836	1.93523	2.01139	2.3234
MG132	nsp2	41594	20587	43114	21456	46269	20034	2.0204	2.00941	2.30952	1.04401	0.999017	0.994027
DMSO	nsp3N	21131	20332	20281	19732	21641	21459	1.0393	1.02782	1.00848
MG132	nsp3N	21233	20298	21254	20489	21065	20498	1.04606	1.03734	1.02766	1.00651	1.00926	1.01902
DMSO	nsp4	10537	10388	10300	11745	10965	11284	1.01434	0.876969	0.97173
MG132	nsp4	18693	14579	17443	13032	19349	14283	1.28219	1.33847	1.35469	1.26406	1.52625	1.3941
DMSO	nsp5	12195	19244	14082	18973	12552	19253	0.633704	0.742213	0.65195
MG132	nsp5	11905	24106	12143	24883	12055	23745	0.49386	0.488004	0.507686	0.779324	0.657499	0.778719
DMSO	nsp6	8978	17938	7686	16937	8016	16352	0.500502	0.453799	0.490215
MG132	nsp6	4908	12905	4860	13562	4820	12983	0.380318	0.358354	0.371255	0.759873	0.789675	0.75733
DMSO	nsp7	18190	43554	16082	44564	14722	42554	0.417642	0.360874	0.34596
MG132	nsp7	18512	47004	16100	47349	15303	46004	0.393839	0.340028	0.332645	0.943005	0.942235	0.961512
DMSO	nsp8	6800	14603	7123	15238	7293	14738	0.465658	0.46745	0.494843
MG132	nsp8	11985	13634	11944	13748	11724	12894	0.879052	0.868781	0.90926	1.88776	1.85855	1.83747
DMSO	nsp9	19087	45675	16673	46676	15823	46673	0.417887	0.357207	0.339018
MG132	nsp9	15674	43385	13881	43884	14117	44625	0.361277	0.316311	0.316347	0.864532	0.885512	0.933128
DMSO	nsp10	5440	39181	5389	38371	5372	39283	0.138843	0.140445	0.136751
MG132	nsp10	5663	37773	6133	37475	5913	37573	0.149922	0.163656	0.157374	1.0798	1.16527	1.1508
DMSO	nsp11	5219	36795	4896	37794	5032	36497	0.14184	0.129544	0.137874
MG132	nsp11	14246	40714	11654	39715	14582	40419	0.349904	0.293441	0.360771	2.4669	2.26518	2.61666
DMSO	nsp12	6868	15028	6851	14759	6851	15372	0.457014	0.464191	0.44568
MG132	nsp12	7884	19448	7937	19232	7876	20035	0.405389	0.412698	0.393112	0.887039	0.889068	0.882049
DMSO	nsp13	14274	15015	14274	14782	14274	15243	0.950649	0.965634	0.93643
MG132	nsp13	16844	15814	20639	15892	20588	15782	1.06513	1.2987	1.30452	1.12043	1.34492	1.39308
DMSO	nsp14	26927	12670	27509	12653	28338	12542	2.12526	2.17411	2.25945
MG132	nsp14	28338	21048	28395	21246	29220	20632	1.34635	1.33649	1.41625	0.633501	0.614729	0.626811
DMSO	nsp15	7650	14603	7956	14732	6579	13968	0.523865	0.540049	0.471005
MG132	nsp15	9088	11634	9120	11256	9393	11097	0.781159	0.810235	0.846445	1.49115	1.5003	1.7971
DMSO	nsp16	9809	14807	11016	14873	9129	14098	0.662457	0.740671	0.647539
MG132	nsp16	44627	22797	41950	22837	40884	22037	1.95758	1.83693	1.85524	2.95503	2.48009	2.86507
Fig.1D	CHX(h)	protein gray value	tubulin gray value	protein gray value	tubulin gray value	protein gray value	tubulin gray value	protein/tubulin	protein/tubulin	protein/tubulin	h/0h(MG132)	h/0h(MG132)	h/0h(MG132)
DMSO	0	3881	31666.7	4859	31457	3408	30872	0.122558	0.154465	0.110391	0.204125	0.276345	0.175347	0.218606
	2	1533	26309.3	985	25975	467	26531	0.0582683	0.0379211	0.0176021	0.0970481	0.0678427	0.0279593	0.0642834
	4	347	21864	643	22485	1	22725	0.0158709	0.0285968	4.40044e-05	0.0264335	0.0511612	6.98971e-05	0.0258882
	8	112	20995.8	393	21065	-2	20986	0.0053344	0.0186565	-9.53016e-05	0.00888465	0.0333775	-0.000151378	0.0140369
	12	96	22163.2	347	22346	0	21972	0.00433151	0.0155285	0	0.0072143	0.0277813	0	0.0116652
	24	0	28494.5	109	27642	68	27521	0	0.00394327	0.00247084	0	0.00705471	0.00392471	0.00365981
MG132	0	11920	19853.2	11159	19964	11944	18972	0.600406	0.558956	0.629559	1	1	1	1
	2	9870	24365.4	9604	23954	9768	23765	0.405082	0.400935	0.411025	0.67468	0.717293	0.652877	0.681616
	4	9769	28306.2	9296	28253	9748	27895	0.345119	0.329027	0.349453	0.57481	0.588646	0.555076	0.572844
	8	9117	19838.4	8570	19623	9690	20715	0.459562	0.436732	0.467777	0.765419	0.781336	0.743023	0.763259
	12	8655	21734.5	7889	20853	9180	22765	0.398214	0.378315	0.403251	0.663242	0.676824	0.640528	0.660198
	24	8096	107371	7335	100737	8968	110827	0.0754024	0.0728134	0.0809189	0.125586	0.130267	0.128533	0.128128
half-life period
DMSO	1.3459	1.6419	1.204
MG132	16.38	15.919	16.28
