# Supplementary material for: SARS-CoV-2 nsp16 is regulated by host E3 ubiquitin ligases, UBR5 and MARCHF7
Source: eLife journal article supplement (doi:10.7554/elife.102277), 2024-12-24
Supplement: fig2-data3 [file elife-102277-fig2-data3-v1.zip]

## Sheet: Fig.2
Fig.2A
DMSO
siRNA	PROTEIN(CT)	GAPDH(CT)	PROTEIN(CT)	GAPDH(CT)	PROTEIN(CT)	GAPDH(CT)		PROTEIN-GAPDH	PROTEIN-GAPDH	PROTEIN-GAPDH	power（2，-）	power（2，-）	power（2，-）		SI/NC
HECTD1	22.41	14.67	22.24	14.52	22.61	14.58		7.74	7.72	8.03	0.00467765	0.00474295	0.00382586		0.186856	0.175556	0.124137
UBR5	20.52	14.75	20.13	14.22	20.94	14.77		5.77	5.91	6.17	0.0183255	0.0166308	0.0138882		0.381565	0.336808	0.386891
MYCPB2	22.57	14.32	22.77	14.51	22.85	14.52		8.25	8.26	8.33	0.00328475	0.00326206	0.00310756		0.329877	0.376312	0.34151
TRIM21	23.11	14.81	23.07	14.66	22.94	14.69		8.3	8.41	8.25	0.00317286	0.00293994	0.00328475		0.460094	0.493116	0.429283
TRIM32	22.76	14.05	22.41	14.35	22.58	14.27		8.71	8.06	8.31	0.00238797	0.00374713	0.00315094		0.5	0.747425	0.602904
MARCHF7	21.05	14.3	21.17	14.48	21.09	14.29		6.75	6.69	6.8	0.00929068	0.00968522	0.00897421		0.420448	0.423373	0.358489
NC-HECTD1	20.28	14.96	20.25	15.04	20.19	15.17		5.32	5.21	5.02	0.0250334	0.0270168	0.0308198
NC-UBR5	19.34	14.96	19.38	15.04	19.97	15.17		4.38	4.34	4.8	0.0480273	0.0493776	0.0358968
NC-MYCPB2	21.61	14.96	21.89	15.04	21.95	15.17		6.65	6.85	6.78	0.0099575	0.00866851	0.00909948
NC-TRIM21	22.14	14.96	22.43	15.04	22.2	15.17		7.18	7.39	7.03	0.00689612	0.00596195	0.00765172
NC-TRIM32	22.67	14.96	22.68	15.04	22.75	15.17		7.71	7.64	7.58	0.00477594	0.00501338	0.00522628
NC-MARCHF7	20.46	14.96	20.49	15.04	20.49	15.17		5.5	5.45	5.32	0.0220971	0.0228763	0.0250334
MG132
HECTD1	22.76	15.74	22.68	15.62	22.84	15.77		7.02	7.06	7.07	0.00770494	0.00749425	0.00744248		0.25349	0.238159	0.275476
UBR5	22.82	15.62	22.73	15.72	22.98	15.69		7.2	7.01	7.29	0.00680118	0.00775854	0.00638986		0.291183	0.376312	0.329877
MYCPB2	23.28	15.41	23.35	15.37	23.55	15.38		7.87	7.98	8.17	0.00427458	0.00396078	0.00347204		0.450625	0.389582	0.376312
TRIM21	22.83	15.09	22.65	14.96	22.69	14.92		7.74	7.69	7.77	0.00467765	0.00484261	0.00458139		0.486327	0.496546	0.524858
TRIM32	23.01	14.82	23.58	14.79	23.27	14.69		8.19	8.79	8.58	0.00342424	0.00225916	0.00261314		0.678302	0.574349	0.650671
MARCHF7	22.81	15.21	22.97	15.14	22.82	15.21		7.6	7.83	7.61	0.00515433	0.00439476	0.00511872		0.438303	0.389582	0.473029
NC-HECTD1	19.75	14.71	19.61	14.62	19.83	14.62		5.04	4.99	5.21	0.0303955	0.0314674	0.0270168
NC-UBR5	20.13	14.71	20.22	14.62	20.31	14.62		5.42	5.6	5.69	0.023357	0.0206173	0.0193704
NC-MYCPB2	21.43	14.71	21.24	14.62	21.38	14.62		6.72	6.62	6.76	0.0094859	0.0101667	0.00922651
NC-TRIM21	21.41	14.71	21.3	14.62	21.46	14.62		6.7	6.68	6.84	0.00961832	0.00975258	0.00872881
NC-TRIM32	22.34	14.71	22.61	14.62	22.58	14.62		7.63	7.99	7.96	0.00504825	0.00393342	0.00401607
NC-MARCHF7	21.12	14.71	21.09	14.62	21.15	14.62		6.41	6.47	6.53	0.0117597	0.0112807	0.0108212
Fig.2B	PROTEIN(CT)	GAPDH(CT)	PROTEIN(CT)	GAPDH(CT)	PROTEIN(CT)	GAPDH(CT)		PROTEIN-GAPDH	PROTEIN-GAPDH	PROTEIN-GAPDH	power（2，-）	power（2，-）	power（2，-）		sh/pLKO.1	sh/pLKO.1	sh/pLKO.1
pLKO.1-UBR5	19.3	14.53	19.47	14.69	19.42	14.64		4.77	4.78	4.78	0.0366511	0.0363979	0.0363979
pLKO.1-MACHF7	19.44	14.47	19.35	14.51	19.33	14.63		4.97	4.84	4.7	0.0319066	0.0349152	0.0384733
shUBR5	21.06	14.44	21.26	14.52	21.22	14.47		6.62	6.74	6.75	0.0101667	0.0093553	0.00929068		0.277392	0.257028	0.255253
shMARCHF7	22.01	15.64	21.98	15.79	21.95	15.73		6.37	6.19	6.22	0.0120904	0.013697	0.0134151		0.378929	0.392292	0.348686
Fig.2C	PROTEIN(CT)	GAPDH(CT)	PROTEIN(CT)	GAPDH(CT)	PROTEIN(CT)	GAPDH(CT)		PROTEIN-GAPDH	PROTEIN-GAPDH	PROTEIN-GAPDH	power（2，-）	power（2，-）	power（2，-）		si/NC
NC-MARCHF7	19.6	14.87	19.51	14.85	19.47	14.76		4.73	4.66	4.71	0.0376815	0.0395549	0.0382075
NC-UBR5	19.08	13.61	19.11	13.67	19.2	13.65		5.47	5.44	5.55	0.0225614	0.0230355	0.0213444
si-MARCHF7	19.07	13.7	19.03	13.62	19	13.65		5.37	5.41	5.35	0.0241807	0.0235195	0.0245183		0.641713	0.594604	0.641713
si-UBR5	20.75	13.95	20.69	13.92	20.72	13.91		6.8	6.77	6.81	0.00897421	0.00916277	0.00891222		0.397768	0.397768	0.417544
