# Supplementary material for: SARS-CoV-2 nsp16 is regulated by host E3 ubiquitin ligases, UBR5 and MARCHF7
Source: eLife journal article supplement (doi:10.7554/elife.102277), 2024-12-24
Supplement: fig2-figsupp1-data3 [file elife-102277-fig2-figsupp1-data3-v1.zip]

## Sheet: Figure 2—figure supplement 1
Figure 2—figure supplement 1A	PROTEIN	GAPDH	PROTEIN	GAPDH	PROTEIN	GAPDH									si/NC
NC	21.11	15.73	21.11	15.79	21.23	15.77		5.38	5.32	5.46		0.0240137	0.0250334	0.0227183
siUBR5	22.78	16.61	22.77	16.69	22.77	16.77		6.17	6.08	6		0.0138882	0.0147822	0.015625	0.578344	0.590496	0.687771
NC	20.57	16.44	20.61	16.56	20.58	16.5		4.13	4.05	4.08		0.0571145	0.060371	0.0591286
siUBR5	22.74	18.08	22.87	18.1	22.8	18.03		4.66	4.77	4.77		0.0395549	0.0366511	0.0366511	0.692555	0.607097	0.619854
Figure 2—figure supplement 1B	PROTEIN	GAPDH	PROTEIN	GAPDH	PROTEIN	GAPDH
NC	22.34	16.93	22.13	16.79	21.98	16.24		5.41	5.34	5.74		0.0235195	0.0246888	0.0187106
siMARCHF7	22.83	15.99	22.71	16.01	23.09	15.97		6.84	6.7	7.12		0.00872881	0.00961832	0.00718897	0.371131	0.389582	0.384219
NC	22.45	18.25	22.54	18.43	22.65	18.27		4.2	4.11	4.38		0.0544094	0.0579118	0.0480273
siMARCHF7	23.31	18.05	23.4	18.28	23.44	18.19		5.26	5.12	5.25		0.0260965	0.0287559	0.026278	0.479632	0.496546	0.547147
