# Supplementary material for: SARS-CoV-2 nsp16 is regulated by host E3 ubiquitin ligases, UBR5 and MARCHF7
Source: eLife journal article supplement (doi:10.7554/elife.102277), 2024-12-24
Supplement: fig4-data3 [file elife-102277-fig4-data3-v1.zip]

## Sheet: Fig.3
Fig.4A	PROTEIN	GAPDH	PROTEIN	GAPDH	PROTEIN	GAPDH		PROTEIN-GAPDH	PROTEIN-GAPDH	PROTEIN-GAPDH	power（2，-）	power（2，-）	power（2，-）		SI/NC
NC	24.92	22.34	24.91	22.5	24.56	22.6		2.58	2.41	1.96	0.167241	0.188156	0.257028
NC	25.06	22.62	25.19	22.7	25.11	22.57		2.44	2.49	2.54	0.184284	0.178006	0.171943
siMARCHF7	22.24	18.9	22.12	18.83	22.15	19.02		3.34	3.29	3.13	0.0987552	0.102238	0.114229		0.590496	0.543367	0.444421
siMARCHF7	20.79	17.27	21.26	17.27	21.17	17.3		3.52	3.99	3.87	0.0871715	0.0629347	0.0683934		0.473029	0.353553	0.397768
Fig.4B
NC	21.19	15.7	21.18	15.62	21.45	15.66		5.49	5.56	5.79	0.0222508	0.0211969	0.0180733
NC	20.39	15.6	20.53	15.58	20.51	15.7		4.79	4.95	4.81	0.0361465	0.032352	0.0356489
siUBR5	22.34	16.06	22.61	15.9	22.61	15.91		6.28	6.71	6.7	0.0128686	0.00955188	0.00961832		0.578344	0.450625	0.532185
siUBR5	21.82	16.46	21.85	16.33	21.86	16.43		5.36	5.52	5.43	0.0243489	0.0217929	0.0231957		0.673617	0.673617	0.650671
Fig.4D
X	COX5A	nsp16	MARCHF7	X	UBR5	nsp16	COX5A	X	GM130	nsp16	MARCHF7	X	UBR5	nsp16	GM130	X	MARCHF7	nsp16	PDI	X	UBR5	nsp16	PDI
0	121.742	136.694	76.047	0	12	20	18	0	101.75	55.75	22.25	0	97	127.5	170.5	0	56.44	53.64	58.48	0	42	48.25	81.25
1	107.112	121.986	71.444	1	27.018	31.632	24.491	1	93.759	68.31	38.62	1	66.136	104.966	157.761	1	66.36	62.04	69.52	1	49.72	58.04	73.36
2	72.83	91.56	57.307	2	38.842	39.632	28.351	2	90.812	62.814	26.496	2	57.614	94.25	151.682	2	77.68	71.32	82.24	2	64.15	65.53	62.72
3	55.315	61.993	17.416	3	77.158	64.053	48.316	3	101.503	54.549	13.463	3	80.75	102.92	158.989	3	94.4	84.4	103.48	3	83.36	88.2	108.68
4	57.474	63.724	18.688	4	108.579	89.14	64.86	4	113.884	55.178	17.084	4	110.273	118.818	164.182	4	118.68	106.64	131.24	4	141.02	147.8	154.34
5	53.06	62.026	25.49	5	146.509	122.316	87.368	5	118.332	58.531	22.785	5	133.273	132.011	166.92	5	134.92	119.64	150.84	5	145.1	160.5	173.3
6	41.312	40.25	43.688	6	133.421	123.895	86.368	6	120.128	62.822	25.9	6	116.341	120	155.341	6	145.04	121.84	167.04	6	117.79	136.14	127.61
7	79.265	27.823	27.207	7	164.439	148.965	115.439	7	118.922	64.316	21.424	7	91.102	103.182	143.591	7	134.84	110.2	167.2	7	121.32	132.92	158.56
8	168.31	71.756	81.923	8	194.333	167.088	149.211	8	116.552	67.692	22.998	8	74.591	97.318	138.955	8	119.32	94.72	149.16	8	216.39	235.2	230.25
9	194.034	53.862	29.889	9	112.789	113.158	122.421	9	116.575	67.448	31.845	9	96.943	117.114	160.591	9	107.72	86.6	141.48	9	255	255	254.96
10	199.64	56.063	7.368	10	82.404	86.754	122.509	10	124.507	67.736	28.16	10	126.591	140.045	191.568	10	98.32	83.56	123.84	10	255	255	255
11	181.415	6.865	2.615	11	72.895	72.14	131.456	11	130.667	72.241	33.89	11	115.125	136.625	199.125	11	81.44	66.8	106.44	11	255	255	255
12	165.956	18.681	1.904	12	56.842	58.368	128.316	12	147.8	73.72	38.36	12	90.955	121.227	193.045	12	51.84	38.28	82.52	12	255	255	255
13	136.347	39.191	7.465	13	67.07	67.263	132.632	13	164.697	69.76	32.281	13	79.568	110.977	188.375	13	14.16	11.44	28.12	13	255	255	247.2
14	159.425	70.865	38.132	14	87.386	87.439	145.439	14	176.254	76.893	42.011	14	82.5	107.386	185.477	14	0	0	6.56	14	252.11	253.47	211.54
15	182.725	113.247	39.93	15	82.421	95.789	143.105	15	192.641	78.531	41.922	15	91.045	106.67	185.045	15	0	0	3.28	15	159.2	174.2	139.6
16	173.613	118.512	18.898	16	84.07	102.316	140.825	16	217.579	83.506	40.502	16	88.136	101.227	184.318	16	0	0	2.2	16	104.1	107.1	72.77
17	178.077	118.297	64.284	17	73.719	96.456	131.491	17	243.36	97.872	60.54	17	93.432	102.125	195.83	17	0.4	0.04	5.96	17	76.54	78.54	46
18	196.34	110.492	92.504	18	109.842	115.053	145.368	18	251.363	105.24	57.365	18	104.25	107.295	218.205	18	11.8	3.72	35.88	18	66.23	67.94	29.29
19	212.095	48.683	28.4	19	149.333	133.667	157.333	19	250.518	113.35	54.549	19	74.341	90.443	217.807	19	55.2	26.2	103.2	19	50.76	52.44	19.96
20	247.884	22.479	2.859	20	144.667	129.789	148.088	20	250.778	105.444	61.778	20	45.227	75.364	212.364	20	105.4	72	153.84	20	46.95	48.6	14.05
21	247.728	34.126	10.354	21	105.842	109.947	123.947	21	249.928	112.099	77.393	21	72.602	93.477	233.545	21	136.96	108.28	187.48	21	51.72	53.72	11.76
22	234.111	40.611	6.222	22	81.982	97.561	115.561	22	241.615	107.814	65.787	22	122	122.75	252.75	22	167.96	141.8	206	22	57.28	59.28	12.59
23	205.755	35.388	1.254	23	90.509	99.351	130.351	23	203.999	127.222	86.733	23	109.568	114.636	242.807	23	173.32	157.08	190.6	23	72.08	74.08	8.32
24	187.843	39.785	5.221	24	61.737	81.947	129.789	24	177.14	154.52	109.05	24	77.273	97.182	232.409	24	149	139.44	154.48	24	84.82	86.82	10.94
25	231.612	77.073	14.184	25	74.86	84.86	156.754	25	164.205	168.007	131.788	25	83.83	105.318	238.216	25	102.4	98.08	108.96	25	106	109	12.5
26	253.021	128.962	54.897	26	22.807	53.93	148.789	26	136.746	156.362	129.377	26	89.409	112.795	233.955	26	76.32	74.8	78.48	26	100.23	103.23	13.53
27	252.248	127.437	61.685	27	48	65.316	178.737	27	116.716	147.727	129.374	27	104.5	123.136	225.727	27	70.12	69.24	66.48	27	94.68	97.24	13.32
28	248.433	96.182	16.993	28	68.368	77.684	203.614	28	99.396	126.871	110.582	28	139.955	138.227	221.273					28	91	94	12.23
29	241.72	81.145	30.627	29	52.386	70.175	199.158	29	61.181	91.865	80.44	29	155.841	139.148	207.193					29	86.48	88.86	13.9
30	164.078	46.969	4.922	30	31.632	56.421	190.105	30	32.25	41.75	20.438	30	138.114	127.159	185.5					30	93	95	12.65
31	127.241	56.384	0	31	53	69.351	204.211					31	131.602	125.841	173.443					31	97.8	100.8	10.28
32	187.251	38.943	0	32	68.053	77.772	208.175					32	173.864	156.364	186.273					32	93.94	96.94	12.16
33	194.637	50.008	1.256	33	59.895	70.421	195.211					33	231.5	198.875	207.125					33	84.7	86.7	14.52
34	156.116	73.145	14.296	34	81.333	83.649	196.105					34	254.25	222.205	209.295					34	81	83	13.23
35	156.814	55.157	35.85	35	94.211	92.947	188.263					35	255	229.216	198.5					35	68.4	70.4	13
36	141.63	31.767	38.806	36	107.842	100.579	184.316					36	255	238.727	200.273					36	64.4	66.4	8.49
37	101.739	78.677	54.73	37	117.193	104.789	180.491					37	255	239.716	202.125					37	61.86	63.86	8.28
38	122.472	124.326	104.361	38	70.333	77.667	147					38	249.114	220.977	193.75					38	53.66	55.66	10.11
39	119.556	91.449	128.065	39	71.053	76.316	140.842					39	221.273	195.034	181.261					39	57.6	58.68	19.08
40	79.815	40.446	53.052	40	76.105	80.667	132.246					40	174.455	165.682	161.636					40	49.45	50.45	30.95
41	165.736	57.822	43.261	41	57.544	71.965	103.772					41	118.58	125.989	131.284					41	60.96	62.92	52
42	219.566	124.102	63.805	42	66.105	79.316	97.842					42	83.568	96.545	114.477					42	81.92	95.92	155.95
43	205.942	122.5	83.837	43	37.228	62.105	75.123					43	64.989	77.136	104.807					43	233.12	250.96	248.96
44	203.716	119.081	110.094	44	59.316	75.526	83.614					44	26	43	73					44	255	255	255
45	206.437	124.271	96.655	45	117.053	109.421	112.421													45	255	255	255
46	156.896	54.465	33.299	46	123.316	115.544	110.702													46	255	255	255
47	138.41	39.354	10.12	47	98.754	105.053	89.158													47	255	255	255
48	116.69	57.999	58.186	48	121.579	121	96.211													48	255	255	237.09
49	25.684	18.708	0.231	49	128.035	124.877	97.877													49	183.48	188.7	133.96
50	36.494	34.016	9.871	50	146.982	137.596	103.123													50	59.25	63.75	46
51	99.704	97.143	62.487	51	174.474	154.684	110.895
52	47.085	43.784	30.799	52	172.491	151.825	102.544
53	20.88	79.01	141.068	53	141.263	124.474	78.351
54	45	113.5	168.5	54	121.368	107.158	66.947
				55	70.719	74.86	43.93
				56	42.684	55.789	34.86
				57	26	43	37
