# Supplementary material for: SARS-CoV-2 nsp16 is regulated by host E3 ubiquitin ligases, UBR5 and MARCHF7
Source: eLife journal article supplement (doi:10.7554/elife.102277), 2024-12-24
Supplement: fig4-figsupp1-data1 [file elife-102277-fig4-figsupp1-data1-v1.zip]

## Sheet: Figure 3—figure supplement 1
Figure 4—figure supplement 1D
	before bleached			bleached
nsp16-YFP	1	1	1	0.32	0.45	0.47
UBR5-CFP	1	1	1	1.22	1.22	1.13
	before bleached			bleached
nsp16-YFP	1	1	1	0.29	0.32
MARCFH7-CFP	1	1	1	1.34	1.14
Figure 4—figure supplement 1E
X	MARCHF7	nsp16	DAPI	X	UBR5	nsp16	DAPI
0	6	22.8125	0	0	1.9375	5.0625	0
1	8.25	24.5162	0	1	1.2941	3.1324	0
2	8.3544	31.1108	0	2	1.9743	6	0.9926
3	13.0019	17.5688	0.3669	3	1.2574	5.7426	3.5735
4	14.1188	24.9821	0	4	3.2059	4.2721	0
5	14.8077	18.6923	0.2308	5	9.7647	3.1324	0
6	11.3	23.0779	3.2227	6	22.5515	8.3419	0.2426
7	14.4012	29.3669	5.4023	7	27.2647	15.3235	1.2794
8	14.9356	30.7356	6.0067	8	23.4963	24.9522	0
9	15.6385	48.9408	9.9846	9	26.5735	37.5735	0.5294
10	23.3798	42.0865	14.9471	10	24.4007	35.1176	4.3199
11	29.1938	36.8131	17.4362	11	17.3971	25.7794	3.2794
12	44.4812	40.1738	22.4813	12	20.8382	30.5331	9.4669
13	46.59	28.4	25.55	13	12.8529	21.2353	18.7647
14	38.2317	29.7238	36.4721	14	18.6324	17.0662	23.1875
15	32.7885	31.2788	44.0192	15	21.3676	18.6324	27.3971
16	37.165	47.5452	51.6038	16	16.9779	22.9338	32.4007
17	27.9485	43.8938	54.41	17	15.5	18.5	42.5
18	25.1675	31.6702	64.5119	18	12.5441	18.5	60.7279
19	22.7465	33.3185	73.4669	19	16.8676	17.0441	72.6471
20	24.5288	32.7885	77.1731	20	18.4338	24.886	69.1765
21	26.5462	24.7946	74.05	21	18.5	24.3088	49.9412
22	26.0394	17.4615	67.2196	22	19.6581	27.7243	47.5919
23	18.0558	17.3462	71.4062	23	25.2206	30.5074	62.0882
24	15.3881	22.6269	70.2769	24	27.7684	26.2647	73.5919
25	17.8077	23.9808	66.5769	25	25.5735	36.3382	67.4706
26	11.87	26.955	62.3475	26	25.25	33.1949	66.5
27	15.0154	19.5635	51.0688	27	30.3676	26.3162	72.0441
28	16.1606	16.5315	42.4342	28	21.8199	17.0772	68.1801
29	16.4769	22.0862	34.9408	29	7.4412	15.5	43.1618
30	11.851	17.2596	42.8413	30	4.75	7.8162	18.7904
31	11.4535	15.1977	41.2481	31	2.7647	8.9779	6.5074
32	16.1	19.2581	37.7465	32	1.2757	3.9044	0.9926
33	11.9	27.7523	34.0138	33	1	5.1176	0
34	13.8777	21.3437	30.7	34	1.9375	5.0625	0
35	15.0385	16.7692	32.4423
36	23.4187	22.7427	35.1112
37	27.3077	18.56	35.2692
38	18.7779	15.0742	37.4846
39	11	19.19	43.22
40	11.1154	11.1154	38.25
41	13.4369	13.4369	30.3446
42	11.4881	16.9804	28.9294
43	11.1592	21.0362	36.1054
44	11.3427	18.1608	44.486
45	13.7692	23.4808	40.8654
46	13.2073	23.184	35.901
47	17.3231	26.1369	23.9154
48	21.1619	30.5765	11.4171
49	25.7362	31.0623	2.8938
50	32.8173	34.6202	0.3173
51	29.05	23.8031	0
52	28.4925	22.1	0.315
53	21.1008	21.02	0
54	19.1692	22.2419	0
55	11.8654	20.3462	0.2885
56	11	14.4283	0
57	19.33	16.3769	0
58	13.6158	20.765	0
59	9.4692	12.8923	0
60	8.625	15.2404	0
61	9.7654	17.5262	0
62	14.5073	15.9356	0
63	9.5135	13.6308	0
64	9.3677	8.25	0
65	8.75	6	0
Figure 4—figure supplement 1F
X	nsp16	MARCHF7	DAPI	X	nsp16	UBR5	DAPI
0	109.562	98.5	0.062	0	71.75	70.75	3.25
1	128.981	113.032	9.045	1	82.388	82.0266	14.278
2	131.99	116.332	7.876	2	82.316	83.9593	0.742
3	137.324	135.167	17.621	3	99.848	106.515	6.461
4	120.069	128.551	4.793	4	108.31	110.999	8.503
5	115.004	125.927	2.152	5	106.325	100.532	1.573
6	124.646	129.229	12.492	6	100.503	88.3372	2.416
7	132.167	130.591	14.828	7	123.917	108.61	14.206
8	123.509	121.895	2.868	8	149.027	132.335	53.48
9	123.321	131.501	1.996	9	141.335	123.269	55.321
10	114.142	127.852	1.288	10	127.428	112.396	58.026
11	119.92	128.85	26.263	11	123.996	116.19	86.56
12	115.48	114.894	46.844	12	101.751	100.126	84.187
13	122.586	114.863	74.322	13	105.961	105.882	116.154
14	130.657	122.426	92.276	14	103.445	100.315	140.06
15	117.735	114.1	99.56	15	79.84	67.1293	133.543
16	103.368	105.058	107.38	16	78.661	57.3804	152.602
17	92.755	93.1709	117.138	17	75.229	49.0658	156.282
18	81.2849	77.4773	127.696	18	92.26	65.5433	180.717
19	69.6327	64.731	141.012	19	80.252	59.0973	156.6
20	72.8568	67.0197	165.051	20	82.088	64.18	153.313
21	65.9355	58.397	165.81	21	63.46	46.9106	129.639
22	62.3916	55.3704	157.296	22	55.506	39.3879	124.227
23	71.0881	69.1474	150.203	23	55.745	40.5829	136.39
24	71.2299	76.51	143.207	24	50.028	37.6892	138.411
25	61.6385	70.6155	135.803	25	50.525	42.1401	140.9
26	54.1406	61.7255	141.043	26	49.481	45.4661	131.667
27	49.2188	55.6492	147.718	27	45.581	46.5843	110.177
28	52.7545	58.7378	151.532	28	44.324	48.4468	100.026
29	52.6745	62.5595	137.543	29	42.954	48.5112	109.027
30	60.3164	64.829	129.277	30	46.241	51.6474	122.449
31	62.4918	61.9746	128.659	31	53.409	55.8199	128.375
32	55.9787	54.5422	137.582	32	70.685	73.1489	133.98
33	55.3094	53.9874	163.145	33	94.177	102.004	134.915
34	51.2827	48.4806	172.722	34	93.504	107.659	104.545
35	53.7804	48.7804	172.846	35	74.694	93.9391	67.6
36	57.6478	54.1478	164.407	36	63.936	83.3953	45.914
37	57.1255	59.6313	156.073	37	58.107	70.575	22.897
38	57.5908	64.8885	155.075	38	51.507	52.4701	4.569
39	66.837	75.7692	167.006	39	58.227	46.2025	2.107
40	53.2229	61.6085	158.059	40	67.883	47.8428	5.259
41	51.2353	61.7705	152.899	41	68.125	49.5	7.125
42	55.14	65.9024	146.83
43	44.9436	48.7321	126.029
44	45.774	51.0655	131.158
45	44.2442	50.6772	132.388
46	38.4974	40.0916	124.927
47	52.2054	51.1879	136.312
48	57.9605	59.4139	137.898
49	57.7502	61.5129	129.545
50	59.4683	63.9048	108.918
51	69.6507	79.1672	86.899
52	73.6115	85.9793	53.377
53	91.6899	101.224	37.185
54	105.075	107.464	35.599
55	80.5855	80.7889	8.432
56	77.0736	78.2049	4.417
57	98.499	100.51	19.897
58	96.8616	99.387	17.565
59	90.5	93.5	15.5
