# Supplementary material for: SARS-CoV-2 nsp16 is regulated by host E3 ubiquitin ligases, UBR5 and MARCHF7
Source: eLife journal article supplement (doi:10.7554/elife.102277), 2024-12-24
Supplement: fig5-data3 [file elife-102277-fig5-data3-v1.zip]

## Sheet: Fig.5
Fig.5C
M	PROTEIN	GAPDH	PROTEIN	GAPDH	PROTEIN	GAPDH									si/nc
NC	20.59	20.43	20.68	20.42	20.68	20.31		0.16	0.26	0.37		0.895025	0.835088	0.773782
siMARCH7	14.89	17.11	14.89	17.09	14.85	17.04		-2.22	-2.2	-2.19		4.65893	4.59479	4.56305	5.20537	5.50217	5.89708
siUBR5	15.02	18.84	15.12	18.92	15.07	18.89		-3.82	-3.8	-3.82		14.1232	13.9288	14.1232	15.7797	16.6795	18.2522
E								0
NC	27.91	20.43	28.1	20.42	27.93	20.31		7.48	7.68	7.62		0.00560139	0.00487629	0.00508337
siMARCH7	22.24	17.11	22.22	17.09	22.2	17.04		5.13	5.13	5.16		0.0285572	0.0285572	0.0279695	5.09824	5.85634	5.50217
siUBR5	21.2	18.84	21.26	18.92	21.25	18.89		2.36	2.34	2.36		0.194791	0.19751	0.194791	34.7755	40.5042	38.3193
Fig.5D
E	CT	CT	CT
NC	19.87	19.77	19.88		10^[(45.949-CT)/3.29]			8.44788e+07	9.06031e+07	8.38896e+07
siMARCH7	17.87	17.84	17.84					3.42492e+08	3.49759e+08	3.49759e+08
siUBR5	15.98	16	15.99					1.28564e+09	1.26777e+09	1.27667e+09
Fig.5E
NC	6.44	6.69	6.38
siMARCHF7	7.04	6.95	7.28
siUBR5	7.98	7.72	7.58
Fig.5F
M	PROTEIN	GAPDH	PROTEIN	GAPDH	PROTEIN	GAPDH									si/nc
NC	16.58	15.66	16.69	15.71	16.64	15.66		0.92	0.98	0.98		0.528509	0.50698	0.50698
siMARCH7	17.65	18.01	17.66	17.91	17.68	17.94		-0.36	-0.25	-0.26		1.28343	1.18921	1.19748	2.42839	2.34567	2.36199
siUBR5	15.58	17.01	15.6	17.06	15.62	17.01		-1.43	-1.46	-1.39		2.69447	2.75108	2.62079	5.09824	5.42642	5.16941
E	PROTEIN	GAPDH	PROTEIN	GAPDH	PROTEIN	GAPDH
NC	23.34	15.66	23.33	15.71	23.35	15.66		7.68	7.62	7.69		0.00487629	0.00508337	0.00484261
siMARCH7	23.81	18.01	23.87	17.91	23.84	17.94		5.8	5.96	5.9		0.0179484	0.0160643	0.0167465	3.68075	3.16017	3.45815
siUBR5	21.89	17.01	21.96	17.06	21.87	17.01		4.88	4.9	4.86		0.0339605	0.0334929	0.0344345	6.9644	6.58873	7.11074
Fig.5G
E	CT	CT	CT
NC	23.26	23.21	23.25		10^[(45.949-CT)/3.29]			7.87685e+06	8.15737e+06	7.93217e+06
siMARCH7	20.64	20.71	20.66					4.92839e+07	4.69276e+07	4.85989e+07
siUBR5	18.67	18.63	18.7					1.95654e+08	2.01209e+08	1.91589e+08
Fig.5H
NC	4.53	4.31	4.57
siMARCHF7	5.5	5.62	5.45
siUBR5	6.31	6.29	6.12
Fig.5B
Wuhan strain	PROTEIN	GAPDH	PROTEIN	GAPDH	PROTEIN	GAPDH									si/nc
NC-MARCHF7	23.64	17.59	23.43	17.28	23.96	17.92		6.05	6.15	6.04		0.0150928	0.014082	0.0151977
NC-UBR5	23.63	17.59	23.49	17.28	24.03	17.92		6.04	6.21	6.11		0.0151977	0.0135084	0.0144779
siMARCH7	24.75	18.22	24.69	18.13	24.7	18.07		6.53	6.56	6.63		0.0108212	0.0105985	0.0100965	0.716978	0.752623	0.664343
siUBR5	26.12	19.03	26.06	18.93	26.05	18.95		7.09	7.13	7.1		0.00734002	0.00713931	0.00728932	0.482968	0.528509	0.503478
OmicronBA.1	PROTEIN	GAPDH	PROTEIN	GAPDH	PROTEIN	GAPDH
NC-MARCHF7	23.76	17.64	23.88	17.8	23.84	17.79		6.12	6.08	6.05		0.0143779	0.0147822	0.0150928
NC-UBR5	23.46	17.64	23.69	17.8	24.08	17.79		5.82	5.89	6.29		0.0177013	0.0168629	0.0127797
siMARCH7	23.56	16.81	23.61	16.74	23.51	16.76		6.75	6.87	6.75		0.00929068	0.00854917	0.00929068	0.646176	0.578344	0.615572
siUBR5	23.51	16.76	24.67	17.9	24.83	17.85		6.75	6.77	6.98		0.00929068	0.00916277	0.00792156	0.524858	0.543367	0.619854
