# Supplementary material for: SARS-CoV-2 nsp16 is regulated by host E3 ubiquitin ligases, UBR5 and MARCHF7
Source: eLife journal article supplement (doi:10.7554/elife.102277), 2024-12-24
Supplement: fig5-figsupp1-data1 [file elife-102277-fig5-figsupp1-data1-v1.zip]

## Sheet: Figure 5—figure supplement 1 
Figure 5—figure supplement 1 A
NC	1	1	1
siMARCHF7	2.31	2.2	2.04
siUBR5	2.98	2.98	2.7
siMARCHF7 and UBR5	3.53	3.375	4.42
Figure 5—figure supplement 1 B	PROTEIN	GAPDH	PROTEIN	GAPDH	PROTEIN	GAPDH						si/NC
NC-MARCHF7	25.8	17.84	25.72	17.9	25.71	17.85		7.96	7.82	7.86		0.00401607	0.00442533	0.00430432
NC-UBR5	22.54	17.84	23.86	17.9	23.65	17.85		4.7	5.96	5.8		0.0384733	0.0160643	0.0179484
siMARCHF7	26.99	17.83	26.77	17.68	27.1	17.69		9.16	9.09	9.41		0.0017481	0.00183501	0.00146997	0.435275	0.41466	0.34151
siUBR5	23.71	17.42	24.71	17.27	24.95	17.27		6.29	7.44	7.68		0.0127797	0.00575886	0.00487629	0.332171	0.358489	0.271684
siMARCHF7 and UBR5-MARCHF7	26.65	17.97	26.67	17.97	27.16	18.04		8.68	8.7	9.12		0.00243815	0.00240458	0.00179724	0.607097	0.543367	0.417544
siMARCHF7 and UBR5-UBR5	22.89	17.97	24.19	17.97	24.31	18.04		4.92	6.22	6.27		0.0330318	0.0134151	0.0129581	0.858565	0.835088	0.721965
