# Supplementary material for: SARS-CoV-2 nsp16 is regulated by host E3 ubiquitin ligases, UBR5 and MARCHF7
Source: eLife journal article supplement (doi:10.7554/elife.102277), 2024-12-24
Supplement: fig6-data3 [file elife-102277-fig6-data3-v1.zip]

## Sheet: Fig.6
Fig.6A
M	PROTEIN	GAPDH	PROTEIN	GAPDH	PROTEIN	GAPDH									/VR
VR	22.86	17.92	22.86	17.73	22.77	17.87		4.94	5.13	4.9		0.0325771	0.0285572	0.0334929
UBR5	26.32	19.68	26.19	19.72	26.26	19.69		6.64	6.47	6.57		0.0100268	0.0112807	0.0105253	0.307786	0.395021	0.314253
UBR5+100ng nsp16	22.84	17.48	22.84	17.64	22.86	17.55		5.36	5.2	5.31		0.0243489	0.0272047	0.0252076	0.747425	0.952638	0.752623
UBR5+200ng nsp16	23.57	19.31	23.69	19.35	23.51	19.3		4.26	4.34	4.21		0.052193	0.0493776	0.0540336	1.60214	1.72907	1.61328
UBR5+400ng nsp16	22.73	18.81	22.68	18.98	22.57	18.82		3.92	3.7	3.75		0.0660636	0.0769465	0.0743254	2.02792	2.69447	2.21914
E	PROTEIN	GAPDH	PROTEIN	GAPDH	PROTEIN	GAPDH									/VR
VR	29.49	17.92	29.24	17.73	29.22	17.87		11.57	11.51	11.35		0.000328914	0.000342882	0.000383098
UBR5	32.18	19.68	32.09	19.72	31.46	19.69		12.5	12.37	11.77		0.000172633	0.000188912	0.000286337	0.524858	0.550953	0.747425
UBR5+100ng nsp16	29.08	17.48	29.07	17.64	29.08	17.55		11.6	11.43	11.53		0.000322145	0.000362433	0.000338161	0.97942	1.05702	0.882703
UBR5+200ng nsp16	30.57	19.31	29.9	19.37	29.65	19.28		11.26	10.53	10.37		0.000407758	0.000676323	0.000755647	1.23971	1.97247	1.97247
UBR5+400ng nsp16	28.83	18.81	28.67	18.98	28.68	18.82		10.02	9.69	9.86		0.000963118	0.00121065	0.00107608	2.92817	3.53081	2.80889
Fig.6B
E	CT	CT	CT
VR	30.63	30.45	30.21	10^[(45.949-CT)/3.29]			45313.9	51397.5	60798.2
UBR5	31.85	31.44	31.27				19293.5	25705.8	28953.6
UBR5+100ng nsp16	30.91	31.09	30.57				37249.9	32840.8	47257.2
UBR5+200ng nsp16	30.33	30.57	30.17				55900.6	47257.2	62524.3
UBR5+400ng nsp16	30.11	29.86	29.58				65205.7	77673.6	94488.7
Fig.6C
VR	2.83	3.04	2.98
UBR5	2.02	2.12	2.22
UBR5+100ng nsp16	2.48	2.62	2.45
UBR5+200ng nsp16	3.02	3.12	2.98
UBR5+400ng nsp16	3.23	3.25	3.12
Fig.6D
M	PROTEIN	GAPDH	PROTEIN	GAPDH	PROTEIN	GAPDH									/VR
VR	22.85	17.11	23.07	17.08	23.12	17.03		5.74	5.99	6.09		0.0187106	0.0157337	0.01468
MARCHF7	24.37	17.34	24.78	17.87	24.29	17.25		7.03	6.91	7.04		0.00765172	0.00831539	0.00759887	0.408951	0.528509	0.517632
MARCHF7+100ng nsp16	22.78	16.56	22.73	16.48	23.61	17.04		6.22	6.25	6.57		0.0134151	0.013139	0.0105253	0.716978	0.835088	0.716978
MARCHF7+200ng nsp16	23.52	17.85	22.85	17.35	22.62	16.94		5.67	5.5	5.68		0.0196408	0.0220971	0.0195052	1.04972	1.40444	1.32869
MARCHF7+400ng nsp16	20.67	16.75	20.65	16.95	20.09	16.34		3.92	3.7	3.75		0.0660636	0.0769465	0.0743254	3.53081	4.89056	5.06303
E	PROTEIN	GAPDH	PROTEIN	GAPDH	PROTEIN	GAPDH									/VR
VR	28.8	17.11	29.23	17.08	29.19	17.03		11.69	12.15	12.16		0.000302663	0.000220032	0.000218512
MARCHF7	30.21	17.27	30.98	17.72	30.52	16.84		12.94	13.26	13.68		0.000127254	0.000101939	7.61921e-05	0.420448	0.463294	0.348686
MARCHF7+100ng nsp16	29.05	17.32	29.61	17.24	29.87	17.73		11.73	12.37	12.14		0.000294387	0.000188912	0.000221562	0.972655	0.858565	1.01396
MARCHF7+200ng nsp16	27.56	16.63	28.27	16.73	27.98	16.25		10.93	11.54	11.73		0.000512557	0.000335826	0.000294387	1.69349	1.52626	1.34723
MARCHF7+400ng nsp16	27.43	17.41	27.53	17.84	27.31	17.45		10.02	9.69	9.86		0.000963118	0.00121065	0.00107608	3.18215	5.50217	4.92458
Fig.6E
E	CT	CT	CT
VR	30.62	30.45	30.21	10^[(45.949-CT)/3.29]	45632.1	51397.5	60798.2
MARCHF7	31.7	31.79	31.85		21429.1	20120.9	19293.5
MARCHF7+100ng nsp16	30.99	31.06	30.8		35221.6	33537.6	40230.9
MARCHF7+200ng nsp16	30.32	30.64	30.36		56293.2	44997.8	54739.1
MARCHF7+400ng nsp16	30.29	29.93	30.16		57487.6	73960	62963.4
Fig.6F
VR	2.83	3.04	2.98
MARCHF7	2.34	2.45	2.58
MARCHF7+100ng nsp16	2.75	2.68	2.7
MARCHF7+200ng nsp16	3.05	3.22	2.98
MARCHF7+400ng nsp16	3.25	3.32	3.26
