# Supplementary material for: SARS-CoV-2 nsp16 is regulated by host E3 ubiquitin ligases, UBR5 and MARCHF7
Source: eLife journal article supplement (doi:10.7554/elife.102277), 2024-12-24
Supplement: fig6-figsupp1-data3 [file elife-102277-fig6-figsupp1-data3-v1.zip]

## Sheet: Figure 6—figure supplement 1
Figure 6—figure supplement 1A
M	PROTEIN	GAPDH	PROTEIN	GAPDH	PROTEIN	GAPDH
VR	20.53	16.97	20.55	17.04	20.6	17.19		3.56	3.51	3.41		0.0847878	0.0877778	0.0940779
UBR5	22.65	18.08	22.22	17.95	22.2	17.91		4.57	4.27	4.29		0.042101	0.0518325	0.0511189	0.496546	0.590496	0.543367
UBR5+100ng nsp16	22.74	18.77	22.5	18.77	22.25	18.56		3.97	3.73	3.69		0.0638133	0.075363	0.0774817	0.752623	0.858565	0.823591
UBR5+200ng nsp16	24.28	20.93	24.02	20.8	23.93	20.84		3.35	3.22	3.09		0.098073	0.107321	0.11744	1.15669	1.22264	1.24833
UBR5+400ng nsp16	20.42	17.81	20.56	17.88	20.52	17.9		2.61	2.68	2.62		0.163799	0.156041	0.162668	1.93187	1.77769	1.72907
E	PROTEIN	GAPDH	PROTEIN	GAPDH	PROTEIN	GAPDH
VR	26.28	16.97	26.49	17.04	26.47	17.19		9.31	9.45	9.28		0.00157547	0.00142977	0.00160858
UBR5	28.06	18.08	27.87	17.95	27.56	17.91		9.98	9.92	9.65		0.000990195	0.00103224	0.00124469	0.628507	0.721965	0.773782
UBR5+100ng nsp16	28.24	18.77	28.3	18.77	27.86	18.56		9.47	9.53	9.3		0.00141009	0.00135265	0.00158643	0.895025	0.946058	0.986233
UBR5+200ng nsp16	29.68	20.93	29.78	20.8	29.57	20.84		8.75	8.98	8.73		0.00232267	0.00198039	0.00235509	1.47427	1.38511	1.46409
UBR5+400ng nsp16	26.15	17.81	26.17	17.88	25.87	17.9		8.34	8.29	7.97		0.0030861	0.00319493	0.00398833	1.95884	2.23457	2.47942
Figure 6—figure supplement 1B
E	CT	CT	CT
VR	32.05	32.16	32.25	10^[(45.949-CT)/3.29]	16773.4	15530.5	14582.4
UBR5	33.06	33.17	33.1		8272.36	7659.4	8043.98
UBR5+100ng nsp16	32.67	32.53	32.85		10868.5	11987.4	9582.06
UBR5+200ng nsp16	32.24	32.14	32.21		14684.8	15749.4	14996.4
UBR5+400ng nsp16	31.64	31.82	31.55		22348.1	19702.8	23801
Figure 6—figure supplement 1C
E
VR	1.98	2.04	1.98
UBR5	1.32	1.48	1.42
UBR5+100ng nsp16	1.74	1.65	1.7
UBR5+200ng nsp16	1.85	1.76	2.02
UBR5+400ng nsp16	2.23	2.12	2.45
Figure 6—figure supplement 1D
M	PROTEIN	GAPDH	PROTEIN	GAPDH	PROTEIN	GAPDH						/VR
VR	21.28	17.07	21.44	17.27	21.27	16.93		4.21	4.17	4.34		0.0540336	0.0555527	0.0493776
MARCHF7	21.99	16.97	21.99	17.04	22.25	17.19		5.02	4.95	5.06		0.0308198	0.032352	0.029977	0.570382	0.582367	0.607097
MARCHF7+100ng nsp16	23.32	18.48	23.09	18.57	23.13	18.52		4.84	4.52	4.61		0.0349152	0.0435857	0.0409498	0.646176	0.784584	0.82932
MARCHF7+200ng nsp16	21.64	18.12	21.75	18.24	21.92	18.23		3.52	3.51	3.69		0.0871715	0.0877778	0.0774817	1.61328	1.58008	1.56917
MARCHF7+400ng nsp16	21.35	18.12	21.73	18.43	21.71	18.26		3.23	3.3	3.45		0.106579	0.101532	0.0915054	1.97247	1.82766	1.85318
E	PROTEIN	GAPDH	PROTEIN	GAPDH	PROTEIN	GAPDH
VR	26.61	17.07	26.6	17.27	26.48	16.93		9.54	9.33	9.55		0.0013433	0.00155378	0.00133402
MARCHF7	27.59	16.97	27.62	17.04	27.73	17.19		10.62	10.58	10.54		0.000635421	0.000653285	0.000671651	0.473029	0.420448	0.503478
MARCHF7+100ng nsp16	28.39	18.48	28.12	18.57	28.41	18.52		9.91	9.55	9.89		0.00103942	0.00133402	0.00105393	0.773782	0.858565	0.790041
MARCHF7+200ng nsp16	27.41	18.12	27.27	18.24	27.31	18.23		9.29	9.03	9.08		0.00159746	0.00191293	0.00184777	1.18921	1.23114	1.38511
MARCHF7+400ng nsp16	26.79	18.12	26.77	18.43	26.66	18.26		8.67	8.34	8.4		0.0024551	0.0030861	0.00296038	1.82766	1.98618	2.21914
Figure 6—figure supplement 1E
E	CT	CT	CT	10^[(45.949-CT)/3.29]
VR	32.05	32.16	32.26		16773.4	15530.5	14480.7
MARCHF7	33.07	33.14	33.24		8214.66	7821.91	7293.2
MARCHF7+100ng nsp16	32.73	32.54	32.75		10421.6	11903.8	10276.7
MARCHF7+200ng nsp16	32.17	32	32.3		15422.2	17370.7	14081
MARCHF7+400ng nsp16	31.76	31.76	31.81		20547.8	20547.8	19841.2
Figure 6—figure supplement 1F
E
VR	1.98	2.04	1.98
MARCHF7	1.34	1.25	1.38
MARCHF7+100ng nsp16	1.75	1.66	1.56
MARCHF7+200ng nsp16	1.98	1.9	2.07
MARCHF7+400ng nsp16	2.45	2.32	2.06
