# Supplementary material for: SARS-CoV-2 nsp16 is regulated by host E3 ubiquitin ligases, UBR5 and MARCHF7
Source: eLife journal article supplement (doi:10.7554/elife.102277), 2024-12-24
Supplement: fig6-figsupp2-data3 [file elife-102277-fig6-figsupp2-data3-v1.zip]

## Sheet: Figure 6—figure supplement 1
Figure 6—figure supplement 2A
M	PROTEIN	GAPDH	PROTEIN	GAPDH	PROTEIN	GAPDH		VR	UBR5-ΔHECT	UBR5-ΔHECT+100ng nsp16	UBR5-ΔHECT+200ng nsp16	UBR5-ΔHECT+400ng nsp16
VR	22.91	17.47	22.76	17.45	22.84	17.54	M	0.949582	1.09078	1.12664	1.14501	1.35852
UBR5-ΔHECT	22.38	17.06	22.28	17.08	22.28	17.33		1.05363	1.16907	1.22436	1.23573	1.34913
UBR5-ΔHECT+100ng nsp16	21.94	16.59	21.82	16.68	21.98	17.02		0.996792	1.16907	1.09583	1.15298	1.35852
UBR5-ΔHECT+200ng nsp16	22.47	17.55	22.36	17.15	22.46	17.25	E	0.976433	0.861901	0.890236	1.12163	0.890236
UBR5-ΔHECT+400ng nsp16	22.46	17.48	22.47	17.76	22.46	17.42		1.10619	0.886132	0.915264	1.03929	0.780386
E	PROTEIN	GAPDH	PROTEIN	GAPDH	PROTEIN	GAPDH		0.917381	1.3064	0.967451	1.07594	0.785814
VR	29.23	17.47	29.05	17.45	29.32	17.54
UBR5-ΔHECT	29.08	17.06	29.04	17.08	28.48	17.33
UBR5-ΔHECT+100ng nsp16	29.64	16.59	28.6	16.68	28.52	17.02
UBR5-ΔHECT+200ng nsp16	28.86	17.55	28.97	17.15	28.92	17.25
UBR5-ΔHECT+400ng nsp16	29.43	17.48	29.62	17.76	29.61	17.42
Figure 6—figure supplement 2B
E	CT	CT	CT
VR	29.67	29.57	29.94	10^[(45.949-CT)/3.29]		67056.9	71918.2	55510.7
UBR5-ΔHECT	29.54	29.64	29.76			73444.2	68479.8	62963.4
UBR5-ΔHECT+100ng nsp16	29.72	29.66	29.52			64751	67527.9	74479.5
UBR5-ΔHECT+200ng nsp16	29.53	29.68	29.08			73960	66589.3	101339
UBR5-ΔHECT+400ng nsp16	29.94	29.53	29.58			55510.7	73960	71416.6
Figure 6—figure supplement 2C
E
VR	3.05	3.09	2.91
UBR5-ΔHECT	3.1	3.06	3
UBR5-ΔHECT+100ng nsp16	3.03	3.05	3.11
UBR5-ΔHECT+200ng nsp16	3.11	3.04	3.27
UBR5-ΔHECT+400ng nsp16	2.91	3.11	3.09
Figure 6—figure supplement 2D
M	PROTEIN	GAPDH	PROTEIN	GAPDH	PROTEIN	GAPDH		VR	MARCHF7-1-582	MARCHF7-1-582+100ng nsp16	MARCHF7-1-582+200ng nsp16	MARCHF7-1-582+400ng nsp16
VR	22.93	17.77	23.08	18.15	23.28	17.95	M	1.11697	1.1067	0.864293	1.09146	1.33138
MARCHF7-1-582	23.11	18.04	23.27	18.26	23.31	18.07		1.00667	0.99052	0.919927	1.069	1.34064
MARCHF7-1-582+100ng nsp16	23.54	18.5	23.45	18.1	23.33	17.99		0.876358	0.963435	0.999717	1.1698	1.28603
MARCHF7-1-582+200ng nsp16	22.82	17.83	22.85	17.85	22.72	17.76	E	1.0529	1.00072	0.903988	0.920852	0.799798
MARCHF7-1-582+400ng nsp16	22.16	17.45	22.15	17.44	22.21	17.43		1.02411	1.11809	1.04563	0.908175	0.912381
E	PROTEIN	GAPDH	PROTEIN	GAPDH	PROTEIN	GAPDH		0.922982	1.00072	0.982395	1.06514	1.05534
VR	29.63	17.77	29.67	18.15	29.82	17.95
MARCHF7-1-582	29.87	18.04	29.71	18.26	29.87	18.07
MARCHF7-1-582+100ng nsp16	30.09	18.5	29.88	18.1	29.97	17.99
MARCHF7-1-582+200ng nsp16	29.68	17.83	29.7	17.85	29.47	17.76
MARCHF7-1-582+400ng nsp16	29.51	17.45	29.32	17.44	29.11	17.43
Figure 6—figure supplement 2E
E	CT	CT	CT	10^[(45.949-CT)/3.29]
VR	28.12	28.54	28.64			198412	147880	137884
MARCHF7-1-582	28.37	28.55	28.46			166564	146848	156396
MARCHF7-1-582+100ng nsp16	28.41	28.51	28.32			161965	151018	172496
MARCHF7-1-582+200ng nsp16	28.2	28.51	27.95			187608	151018	223481
MARCHF7-1-582+400ng nsp16	28.35	28.72	28.21			168912	130376	186300
Figure 6—figure supplement 2F
E
VR		3.7	3.4	3.38
MARCHF7-1-582		3.44	3.4	3.42
MARCHF7-1-582+100ng nsp16		3.43	3.41	3.45
MARCHF7-1-582+200ng nsp16		3.47	3.41	3.9
MARCHF7-1-582+400ng nsp16		3.44	3.37	3.47
