# Supplementary material for: SARS-CoV-2 nsp16 is regulated by host E3 ubiquitin ligases, UBR5 and MARCHF7
Source: eLife journal article supplement (doi:10.7554/elife.102277), 2024-12-24
Supplement: fig6-figsupp4-data3 [file elife-102277-fig6-figsupp4-data3-v1.zip]

## Sheet: Figure 6—figure supplement 3
Figure 6—figure supplement 4A
MARCHF7	PROTEIN	GAPDH	PROTEIN	GAPDH	PROTEIN	GAPDH
Wuhan-0	19.23	14.27	19.12	13.9	19.22	14.14		4.96	5.22	5.08	0.0321286	0.0268302	0.0295643
Wuhan-0.0001	25.2	19.84	25.24	19.76	25.18	19.81		5.36	5.48	5.37	0.0243489	0.0224056	0.0241807		0.757858	0.835088	0.817902
Wuhan-0.001	25.42	19.1	25.6	19.17	25.48	19.28		6.32	6.43	6.2	0.0125167	0.0115978	0.0136024		0.389582	0.432269	0.460094
Wuhan-0.01	28.89	20.3	28.62	20.04	28.72	20.05		8.59	8.58	8.67	0.00259509	0.00261314	0.0024551		0.0807721	0.0973956	0.0830429
MARCHF7	PROTEIN	GAPDH	PROTEIN	GAPDH	PROTEIN	GAPDH
Omicron BA.1-0	19.23	14.27	19.12	13.9	19.22	14.14		4.96	5.22	5.08	0.0321286	0.0268302	0.0295643
Omicron BA.1-0.0001	25.83	19.63	25.54	19.65	25.72	19.79		6.2	5.89	5.93	0.0136024	0.0168629	0.0164018		0.423373	0.628507	0.554785
Omicron BA.1-0.001	25.97	18.63	25.85	18.32	25.81	18.38		7.34	7.53	7.43	0.0061722	0.00541058	0.00579892		0.192109	0.20166	0.196146
Figure 6—figure supplement 4B
UBR5	PROTEIN	GAPDH	PROTEIN	GAPDH	PROTEIN	GAPDH
Wuhan-0	20.54	14.27	20.38	13.9	20.36	14.14		6.27	6.48	6.22	0.0129581	0.0112028	0.0134151
Wuhan-0.0001	24.58	19.84	24.63	19.76	24.54	19.81		4.74	4.87	4.73	0.0374212	0.0341967	0.0376815		2.88786	3.05252	2.80889
Wuhan-0.001	24.35	19.1	24.57	19.17	24.54	19.28		5.25	5.4	5.26	0.026278	0.0236831	0.0260965		2.02792	2.11404	1.94531
Wuhan-0.01	27.31	20.3	27.29	20.04	27.51	20.05		7.01	7.25	7.46	0.00775854	0.0065695	0.00567958		0.598739	0.586417	0.423373
UBR5	PROTEIN	GAPDH	PROTEIN	GAPDH	PROTEIN	GAPDH
Omicron BA.1-0	20.54	14.27	20.38	13.9	20.36	14.14		6.27	6.48	6.22	0.0129581	0.0112028	0.0134151
Omicron BA.1-0.0001	25.07	19.63	24.74	19.65	24.85	19.79		5.44	5.09	5.06	0.0230355	0.0293601	0.029977		1.77769	2.62079	2.23457
Omicron BA.1-0.001	24.21	17.63	24.11	17.32	24.31	17.38		6.58	6.79	6.93	0.0104526	0.00903663	0.00820091		0.806642	0.806642	0.61132
Figure 6—figure supplement 4D
UBR5	PROTEIN	GAPDH	PROTEIN	GAPDH	PROTEIN	GAPDH	PROTEIN	GAPDH	PROTEIN	GAPDH	PROTEIN	GAPDH	PROTEIN	GAPDH	PROTEIN	GAPDH	PROTEIN	GAPDH
Ordinary patients	23.69	18.86	23.89	18.94	23.88	18.9	25.36	20.44	26.95	21.95	26.83	21.88	26.87	21.86	26.94	21.95	26.73	21.88
	4.83		4.95		4.98		4.92		5		4.95		5.01		4.99		4.85
	0.0351581		0.032352		0.0316862		0.0330318		0.03125		0.032352		0.0310341		0.0314674		0.034674
Severe patients	25.54	19.97	25.57	19.99	25.51	19.84	26.29	20.67	26.25	20.57	26.15	20.68
	5.57		5.58		5.67		5.62		5.68		5.47
	0.0210505		0.0209051		0.0196408		0.0203335		0.0195052		0.0225614
Critical patients	26.2	19.01	26.24	19.08	26.13	19.01	25.83	19.08	26.03	19.01
	7.19		7.16		7.12		6.75		7.02
	0.00684848		0.00699238		0.00718897		0.00929068		0.00770494
MARCHF7	PROTEIN	GAPDH	PROTEIN	GAPDH	PROTEIN	GAPDH	PROTEIN	GAPDH	PROTEIN	GAPDH	PROTEIN	GAPDH	PROTEIN	GAPDH	PROTEIN	GAPDH	PROTEIN	GAPDH
Ordinary patients	26.03	18.86	25.77	18.94	25.44	18.9	26.35	20.44	27.74	21.95	27.68	21.88	27.56	21.86	27.63	21.95	27.71	21.88
	7.17		6.83		6.54		5.91		5.79		5.8		5.7		5.68		5.83
	0.00694408		0.00878952		0.0107464		0.0166308		0.0180733		0.0179484		0.0192366		0.0195052		0.017579
Severe patients	25.95	19.97	26.04	19.99	25.34	19.84	25.71	20.67	25.17	20.57	26.57	20.68
	5.98		6.05		5.5		5.04		4.6		5.89
	0.0158431		0.0150928		0.0220971		0.0303955		0.0412346		0.0168629
Critical patients	24.51	19.01	24.34	19.08	24.36	19.01	25.55	19.08	25.47	19.01
	5.5		5.26		5.35		6.47		6.46
	0.0220971		0.0260965		0.0245183		0.0112807		0.0113592
