# Supplementary material for: SARS-CoV-2 nsp16 is regulated by host E3 ubiquitin ligases, UBR5 and MARCHF7
Source: eLife journal article supplement (doi:10.7554/elife.102277), 2024-12-24
Supplement: fig7-data3 [file elife-102277-fig7-data3-v1.zip]

## Sheet: Fig.7
Fig.7C	CT	CT	CT
VR	22	21.56	21.64		10^[(45.949-CT)/3.29]		1.90253e+07	2.58863e+07	2.44768e+07
MARCHF7	23.9	24.07	24.07				5.03296e+06	4.4684e+06	4.4684e+06
UBR5	23.94	22.48	22.85				4.89402e+06	1.35967e+07	1.04948e+07
Fig.7D
VR	3.9	4.2	3.8
MARCHF7	3.4	3.21	3.24
UBR5	3.38	3.59	3.6
Fig.7E	Days	weight(g)	uninfected			infected
VR	1	17.5	18.3	18.3		17.2	17.2	18.1
	2	18.2	18.9	18.4		16.7	16.5	17
	3	19.4	18.7	19.5		16.4	15.1	16.3
	4	18.9	19.5			15.2	15.1	14.8
	5	19.2	19.3			14.3	15.4	15
MARCHF7	1	18.4	18.2	18.9		18.6	17.3	17.6
	2	18.1	18.7	19.2		16.6	17.1	16.7
	3	18.5	19.5	19.4		16.4	17.7	16.3
	4	18.3	19.4			16.2	16.5	16.3
	5	18.1	19.4			16.6	16.4	16.2
UBR5	1	18.1	18.1	18.1		18	18.4	17.9
	2	18.3	18.3	18.6		17.5	17.8	17.2
	3	18.9	18.9	18.9		16.4	16.8	16.8
	4	18.9	18.9			16.3	16	16.7
	5	18.8	19.6			16.8	16.2	16.3
Fig.7H
IL-6
uninfected	PROTEIN	GAPDH	PROTEIN	GAPDH	PROTEIN	GAPDH									/VR
vr	27.07	22.32	26.96	22.72	27.07	22.73		4.75	4.24	4.34		0.0371627	0.0529216	0.0493776
MARCHF7	27.3	23.49	27.37	23.54	27.06	23.52		3.81	3.83	3.54		0.0712977	0.0703162	0.0859714	1.91853	1.32869	1.7411
UBR5	27.6	23.37	27.28	23.49	27.45	23.36		4.23	3.79	4.09		0.0532897	0.072293	0.0587202	1.43396	1.36604	1.18921
infected	PROTEIN	GAPDH	PROTEIN	GAPDH	PROTEIN	GAPDH
vr	24.77	22.1	24.12	22.09	24.13	22.18		2.67	2.03	1.95		0.157127	0.244855	0.258816	4.22807	4.62675	5.24157
MARCHF7	26.37	22.56	25.55	22.53	25.99	22.45		3.81	3.02	3.54		0.0712977	0.123279	0.0859714	1.91853	2.32947	1.7411
UBR5	25.94	22.97	25.84	22.88	25.89	22.76		2.97	2.96	3.13		0.127627	0.128514	0.114229	3.43426	2.42839	2.31338
IL-1RA
uninfected	PROTEIN	GAPDH	PROTEIN	GAPDH	PROTEIN	GAPDH
vr	22.56	22.44	22.68	22.53	22.62	22.67		0.12	0.15	-0.05		0.920188	0.90125	1.03526
MARCHF7	21.67	22.06	21.83	22.06	21.89	21.98		-0.39	-0.23	-0.09		1.31039	1.17283	1.06437	1.42405	1.30134	1.02811
UBR5	22.33	22.32	22.56	22.72	22.35	22.73		0.01	-0.16	-0.38		0.993092	1.11729	1.30134	1.07923	1.23971	1.25701
infected	PROTEIN	GAPDH	PROTEIN	GAPDH	PROTEIN	GAPDH
vr	22.2	23.54	22.22	23.52	21.66	23.49		-1.34	-1.3	-1.83		2.53151	2.46229	3.55537	2.75108	2.73208	3.43426
MARCHF7	22.8	22.97	22.05	22.88	22.12	22.76		-0.17	-0.83	-0.64		1.12506	1.77769	1.55833	1.22264	1.97247	1.50525
UBR5	21.36	21.72	21.31	21.86	21.5	21.89		-0.36	-0.55	-0.39		1.28343	1.46409	1.31039	1.39474	1.6245	1.26576
IL-1β
uninfected	PROTEIN	GAPDH	PROTEIN	GAPDH	PROTEIN	GAPDH
vr	26.64	22.44	26.65	22.53	26.68	22.67		4.2	4.12	4.01		0.0544094	0.0575117	0.0620683
MARCHF7	26.21	22.32	26.92	22.72	26.61	22.73		3.89	4.2	3.88		0.0674518	0.0544094	0.0679209	1.23971	0.946058	1.09429
UBR5	27.22	22.97	26.99	22.88	26.74	22.76		4.25	4.11	3.98		0.052556	0.0579118	0.0633725	0.965936	1.00696	1.02101
infected	PROTEIN	GAPDH	PROTEIN	GAPDH	PROTEIN	GAPDH
vr	25.85	23.54	25.86	23.52	25.31	23.49		2.31	2.34	1.82		0.20166	0.19751	0.283221	3.70635	3.43426	4.56305
MARCHF7	26.97	23.37	26.75	23.49	26.53	23.36		3.6	3.26	3.17		0.0824692	0.104386	0.111105	1.51572	1.81504	1.79005
UBR5	25.14	21.72	24.61	21.86	24.69	21.89		3.42	2.75	2.8		0.0934281	0.148651	0.143587	1.71713	2.58471	2.31338
