# Supplementary material for: SARS-CoV-2 nsp16 is regulated by host E3 ubiquitin ligases, UBR5 and MARCHF7
Source: eLife journal article supplement (doi:10.7554/elife.102277), 2024-12-24
Supplement: fig8-figsupp1-data3 [file elife-102277-fig8-figsupp1-data3-v1.zip]

## Sheet: Fig.7
Figure 8—figure supplement 1D
	NC			siMARCHF7			siUBR5
nsp16-WT	1	1	1	0.514057	0.479632	0.441351	0.747425	0.68302	0.558644
nsp16-K76R	1	1	1	0.558644	0.550953	0.574349	0.697372	0.673617	0.852635
