# Supplementary figures and images for: SARS-CoV-2 nsp16 is regulated by host E3 ubiquitin ligases, UBR5 and MARCHF7
Source: eLife journal article supplement (doi:10.7554/elife.102277), 2024-12-24

Figure 1E

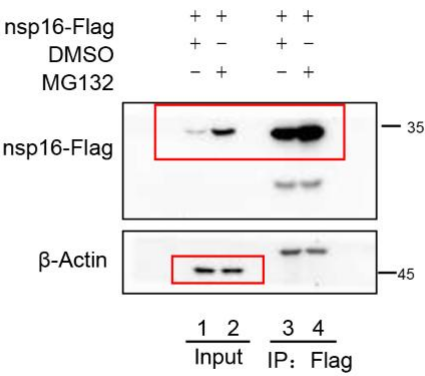

Supplement: fig1-data1 [file elife-102277-fig1-data1-v1.zip]

Figure 1B

Fig.1B

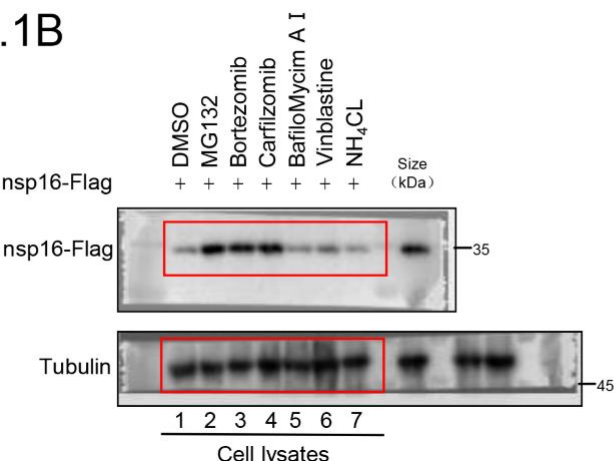

Supplement: fig1-data1 [file elife-102277-fig1-data1-v1.zip]

Figure 1A

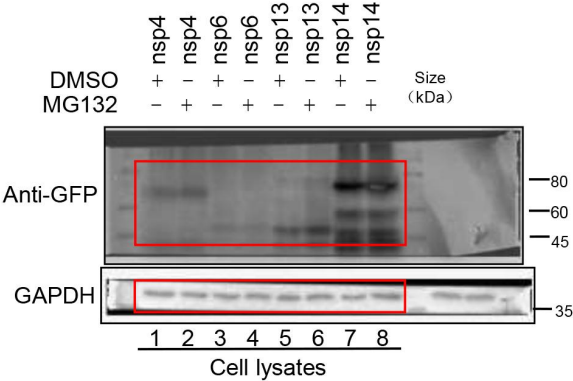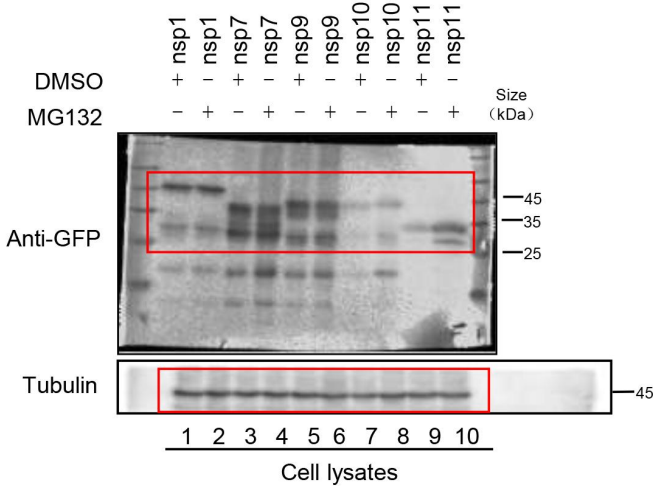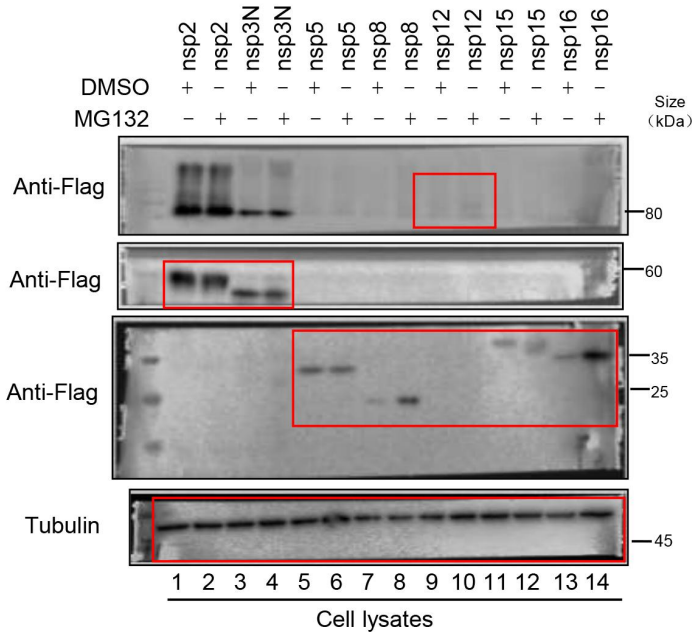

Supplement: fig1-data1 [file elife-102277-fig1-data1-v1.zip]

Figure 1C

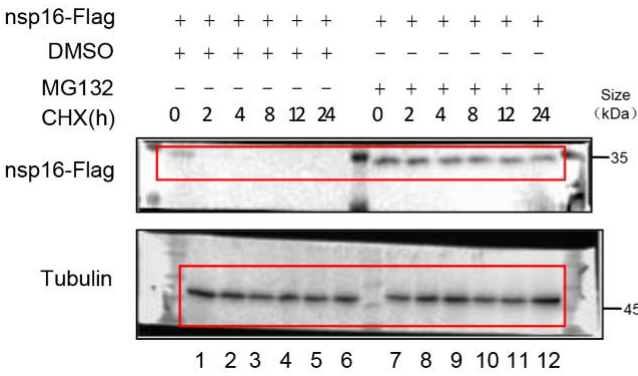

Supplement: fig1-data1 [file elife-102277-fig1-data1-v1.zip]

Figure 2D

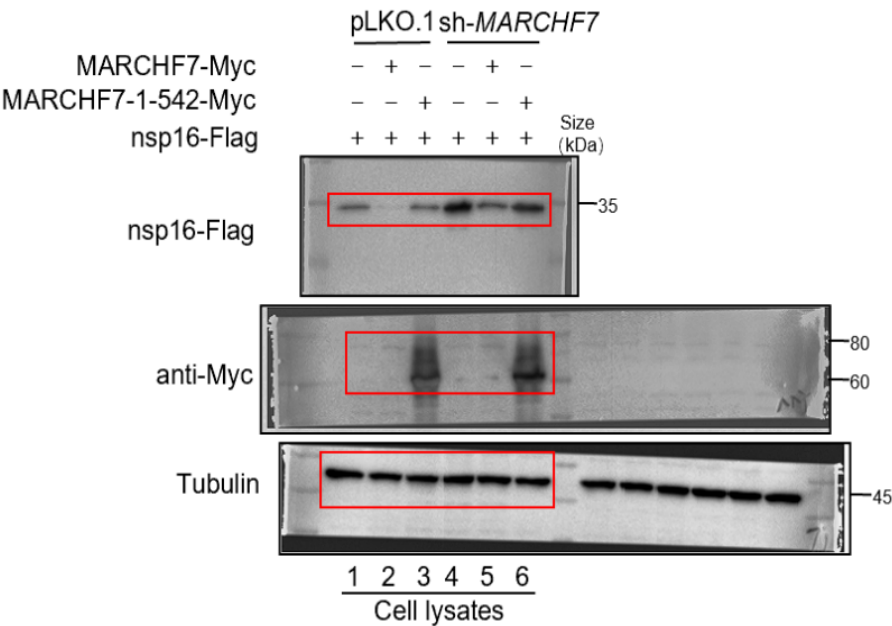

Supplement: fig2-data1 [file elife-102277-fig2-data1-v1.zip]

Figure 2E

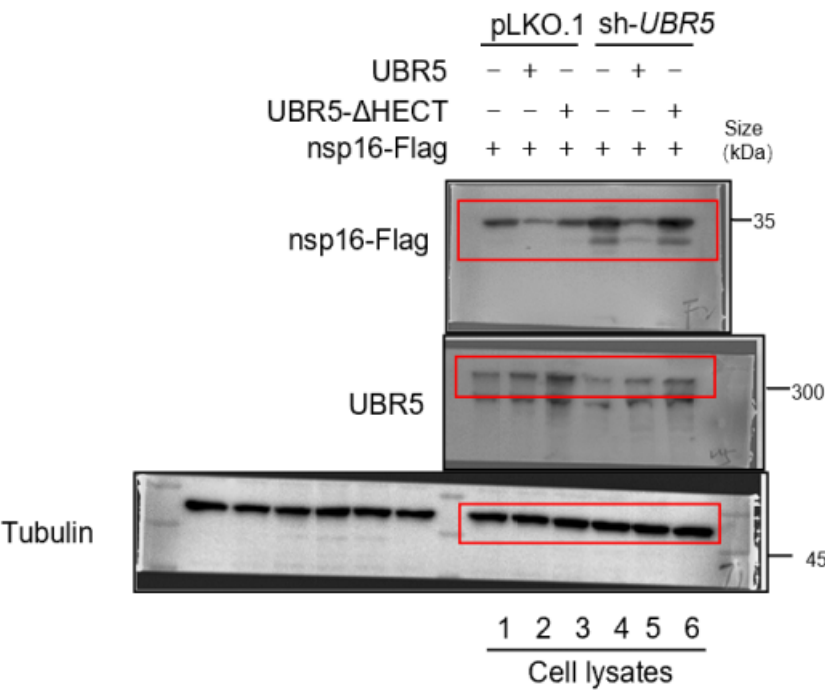

Supplement: fig2-data1 [file elife-102277-fig2-data1-v1.zip]

Figure 2B

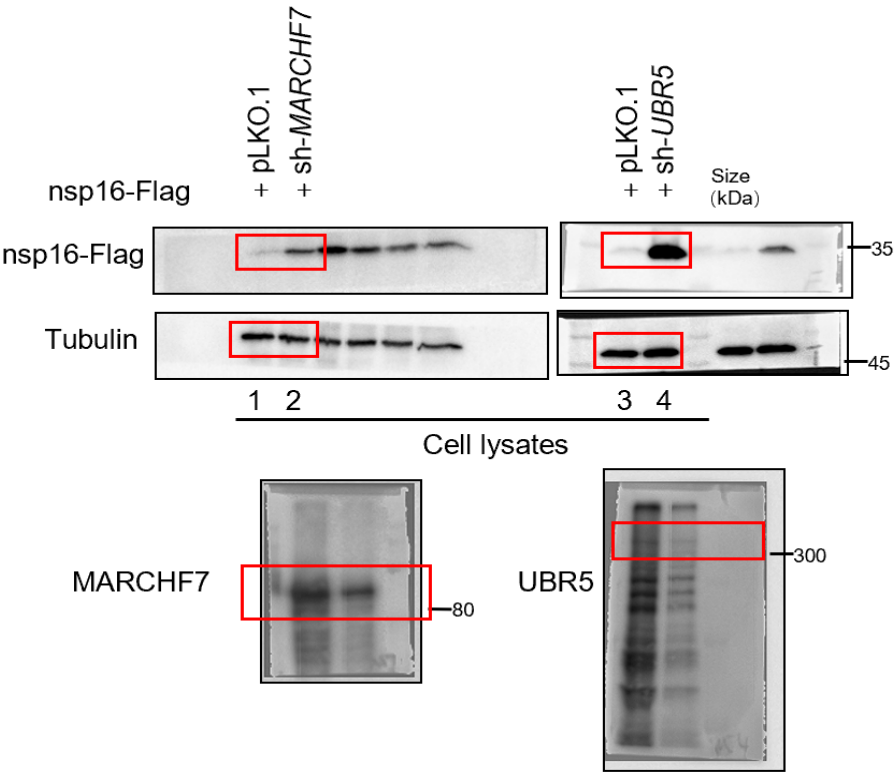

Supplement: fig2-data1 [file elife-102277-fig2-data1-v1.zip]

Figure 2A

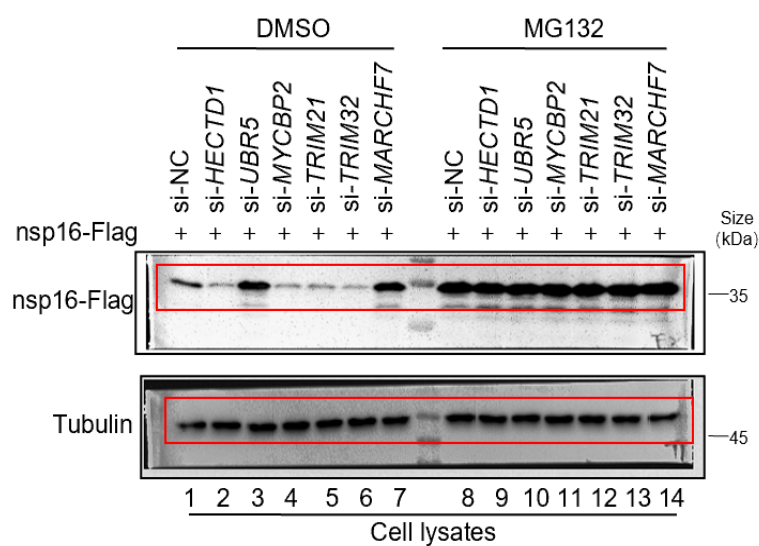

Supplement: fig2-data1 [file elife-102277-fig2-data1-v1.zip]

Figure 2C

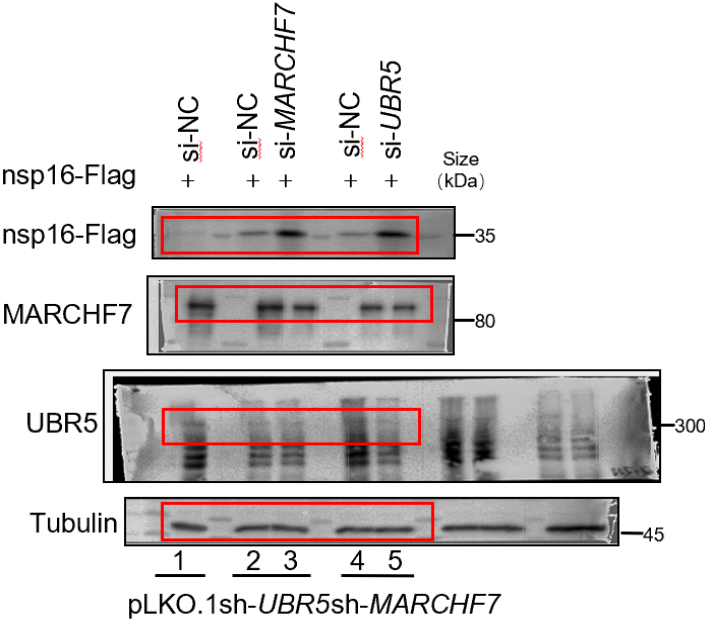

Supplement: fig2-data1 [file elife-102277-fig2-data1-v1.zip]

Figure 2—figure supplement 1B

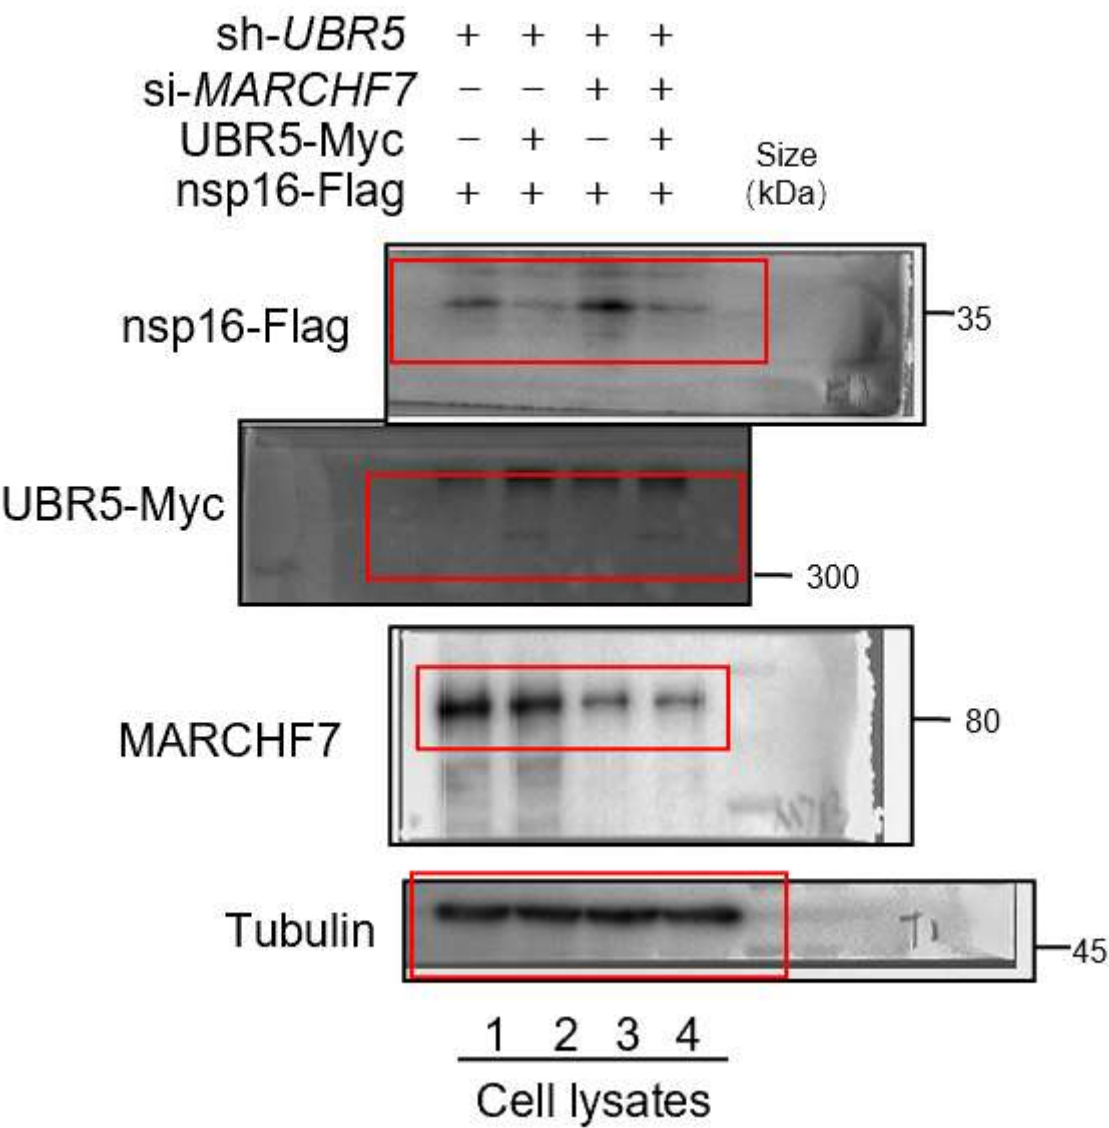

Supplement: fig2-figsupp1-data1 [file elife-102277-fig2-figsupp1-data1-v1.zip]

Figure 2—figure supplement 1A

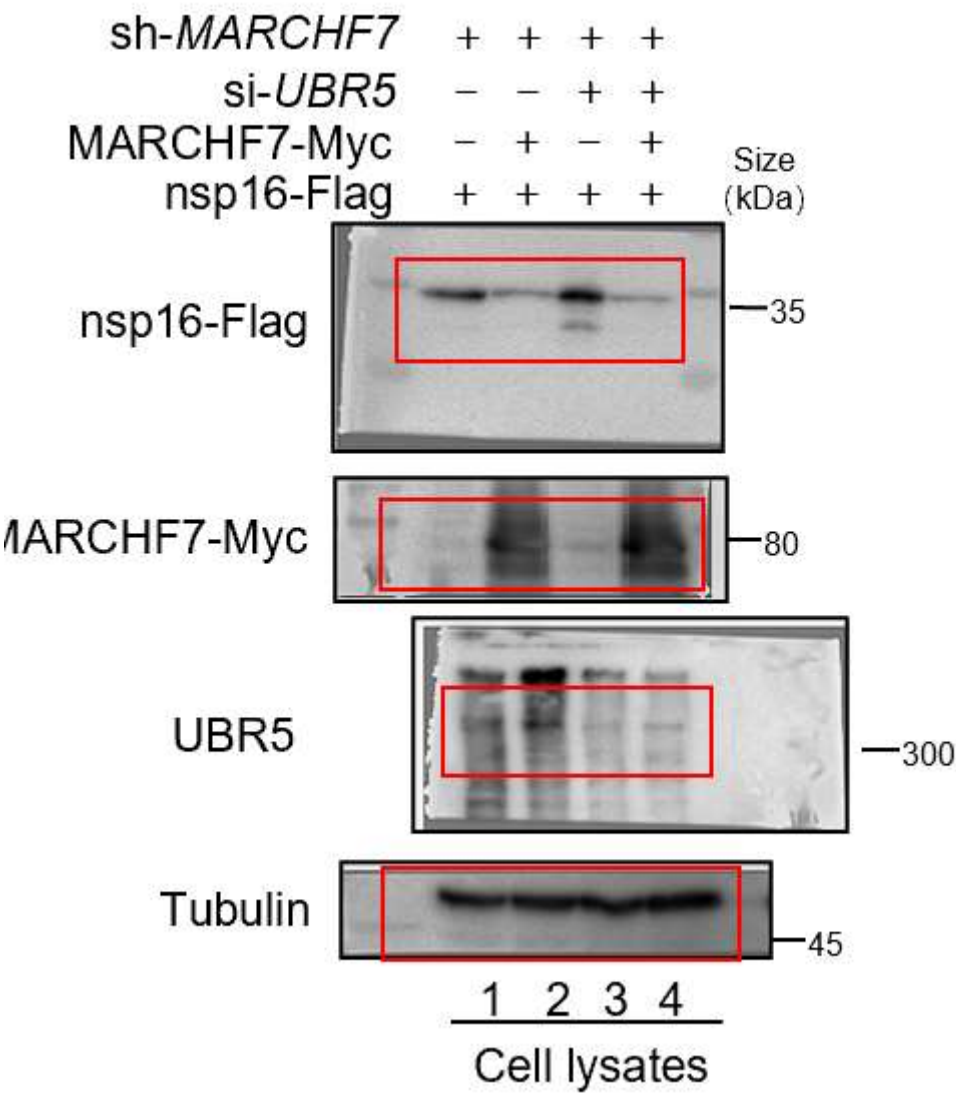

Supplement: fig2-figsupp1-data1 [file elife-102277-fig2-figsupp1-data1-v1.zip]

Figure 3A

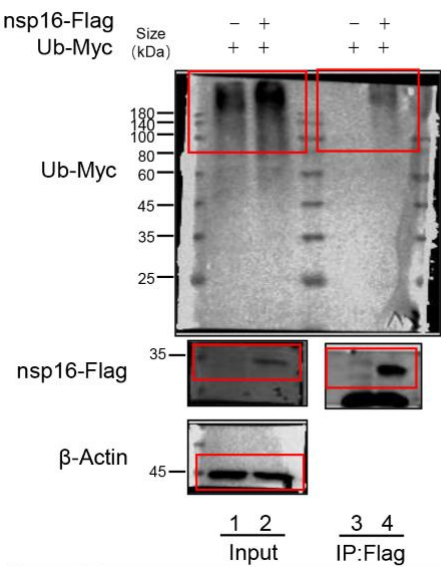

Supplement: fig3-data1 [file elife-102277-fig3-data1-v1.zip]

Figure 3B

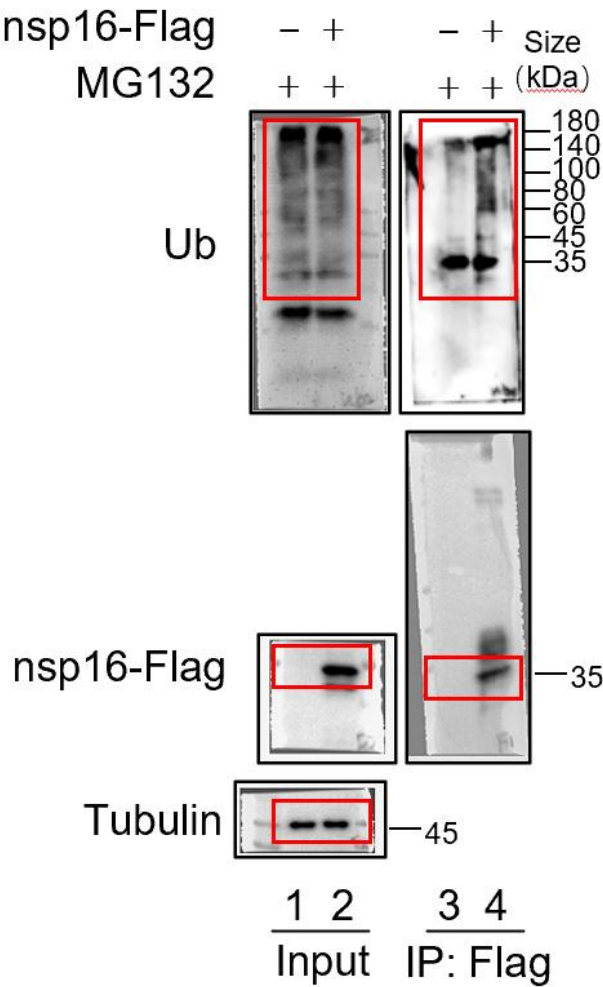

Supplement: fig3-data1 [file elife-102277-fig3-data1-v1.zip]

Figure.3F

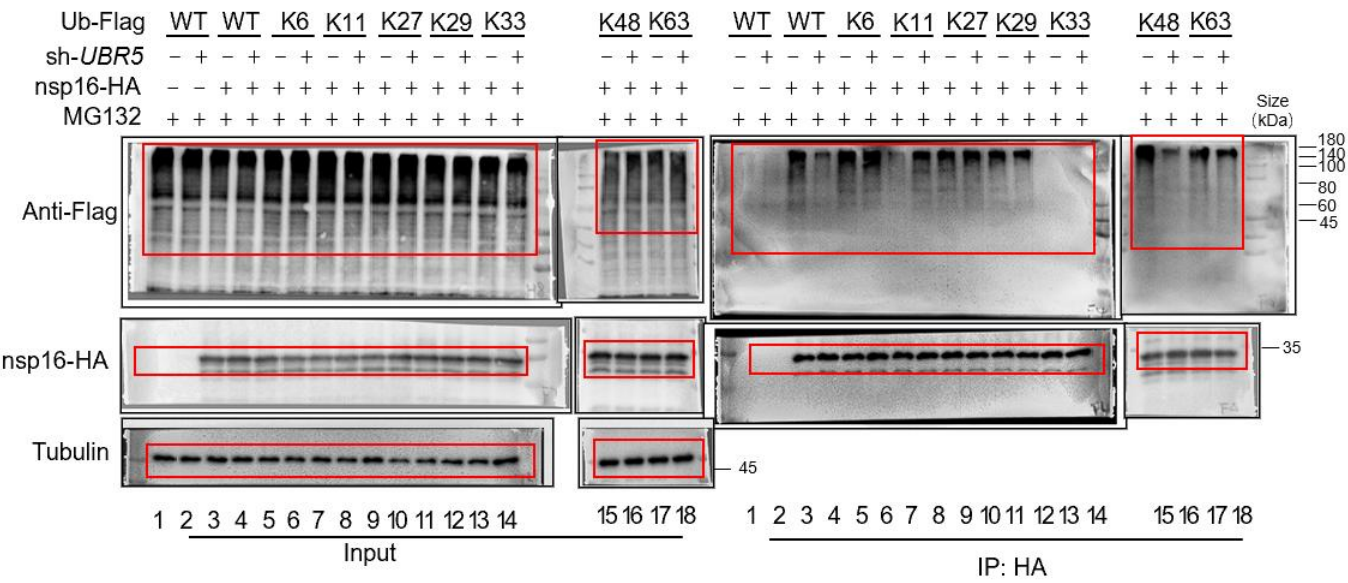

Supplement: fig3-data1 [file elife-102277-fig3-data1-v1.zip]

Figure.3E

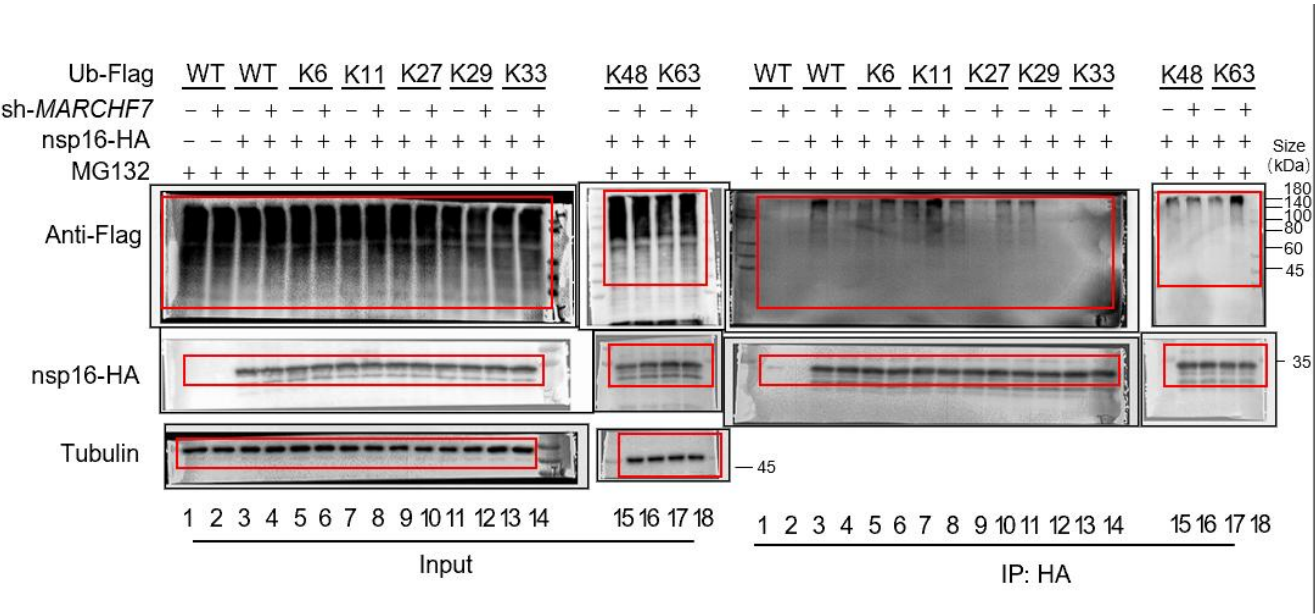

Supplement: fig3-data1 [file elife-102277-fig3-data1-v1.zip]

Figure 3C

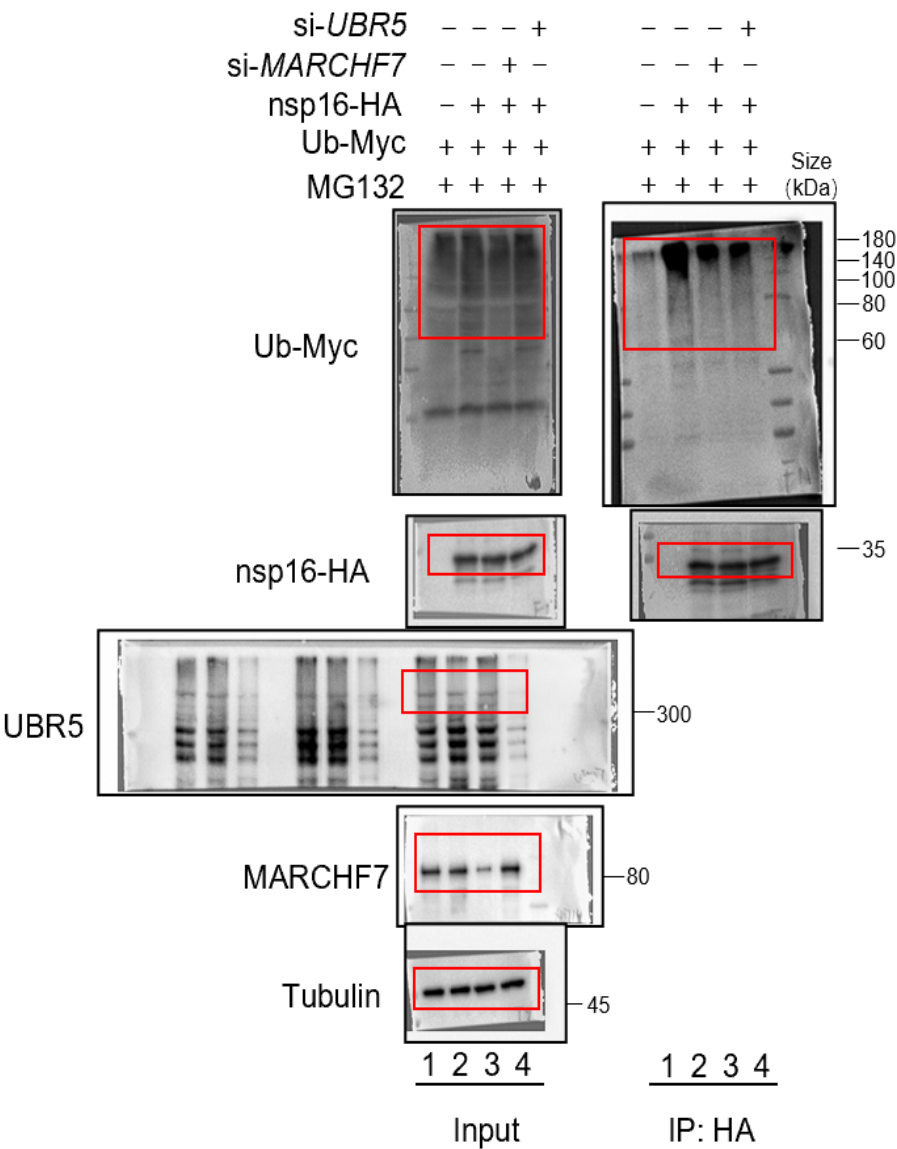

Supplement: fig3-data1 [file elife-102277-fig3-data1-v1.zip]

Figure 3D

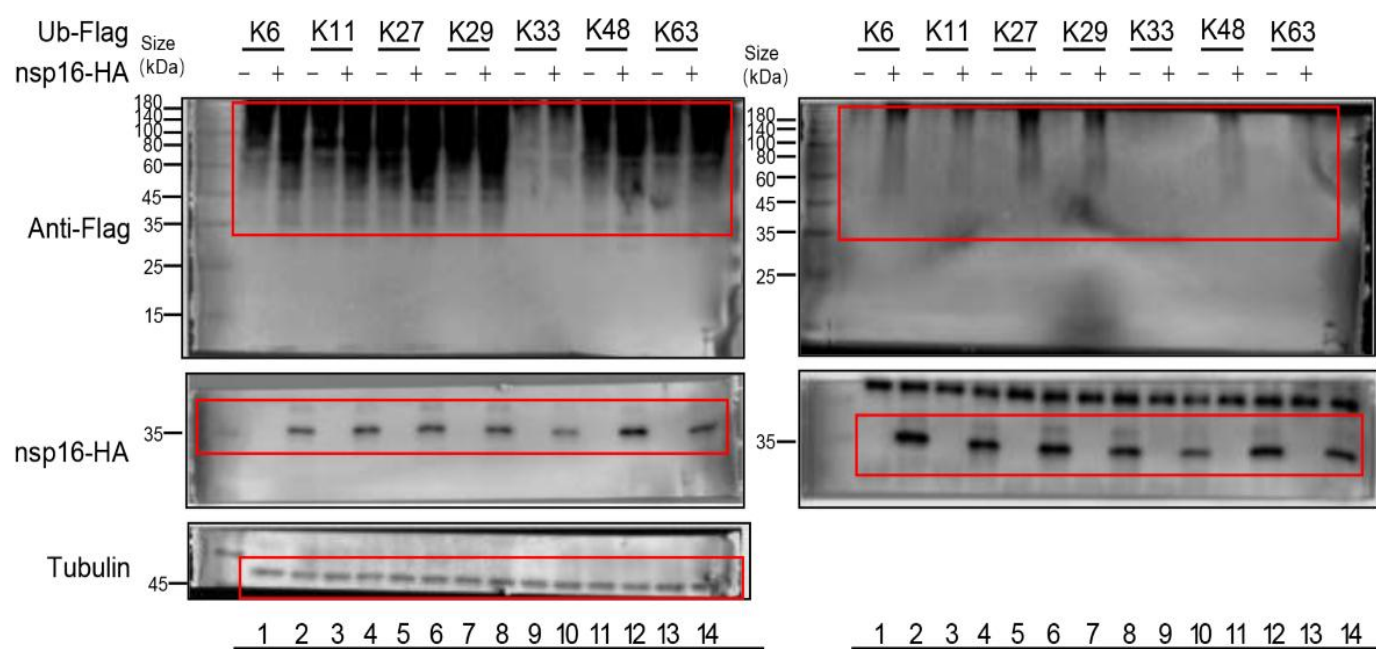

Supplement: fig3-data1 [file elife-102277-fig3-data1-v1.zip]

Figure 4B

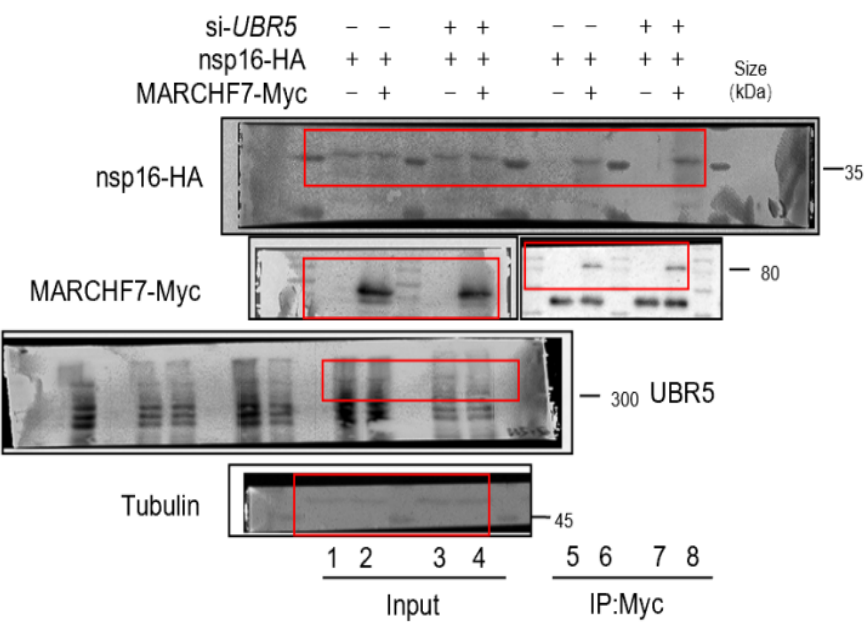

Supplement: fig4-data1 [file elife-102277-fig4-data1-v1.zip]

Figure.4A

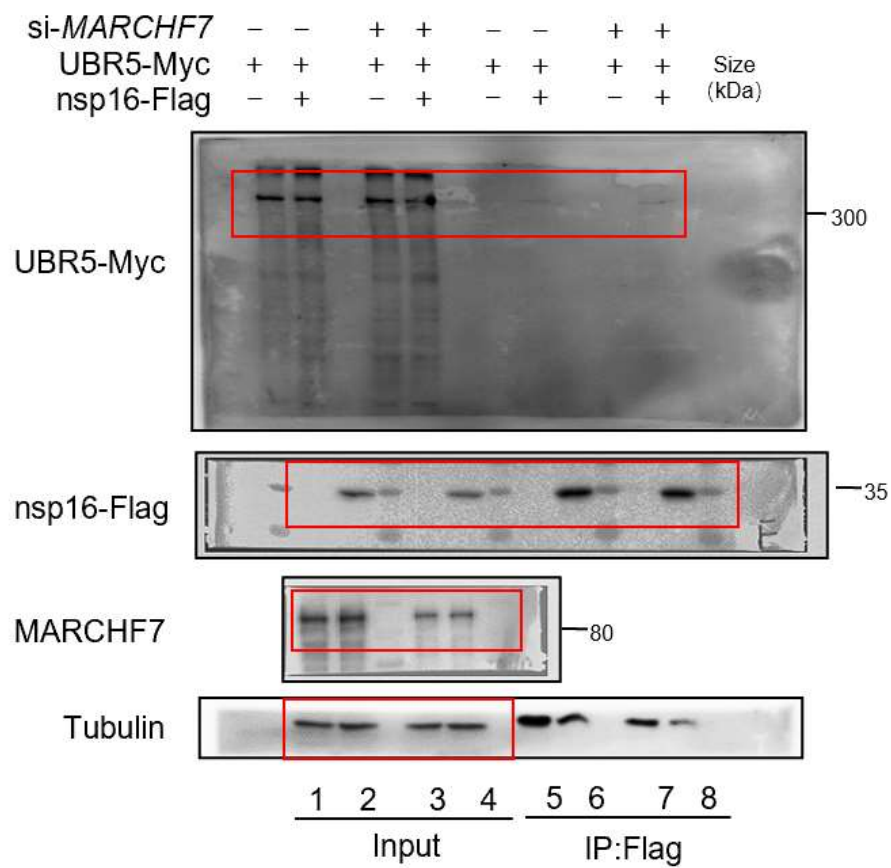

Supplement: fig4-data1 [file elife-102277-fig4-data1-v1.zip]

Figure 4—figure supplement 2B

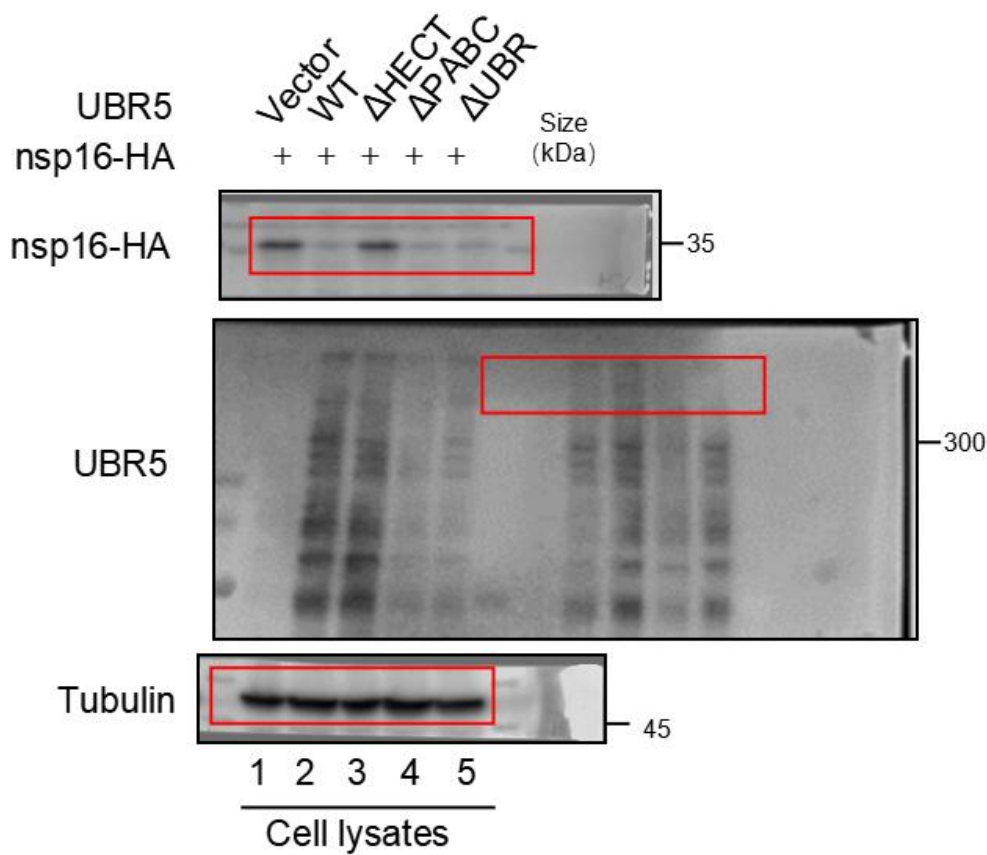

Supplement: fig4-figsupp2-data1 [file elife-102277-fig4-figsupp2-data1-v1.zip]

Figure 4—figure supplement 2F

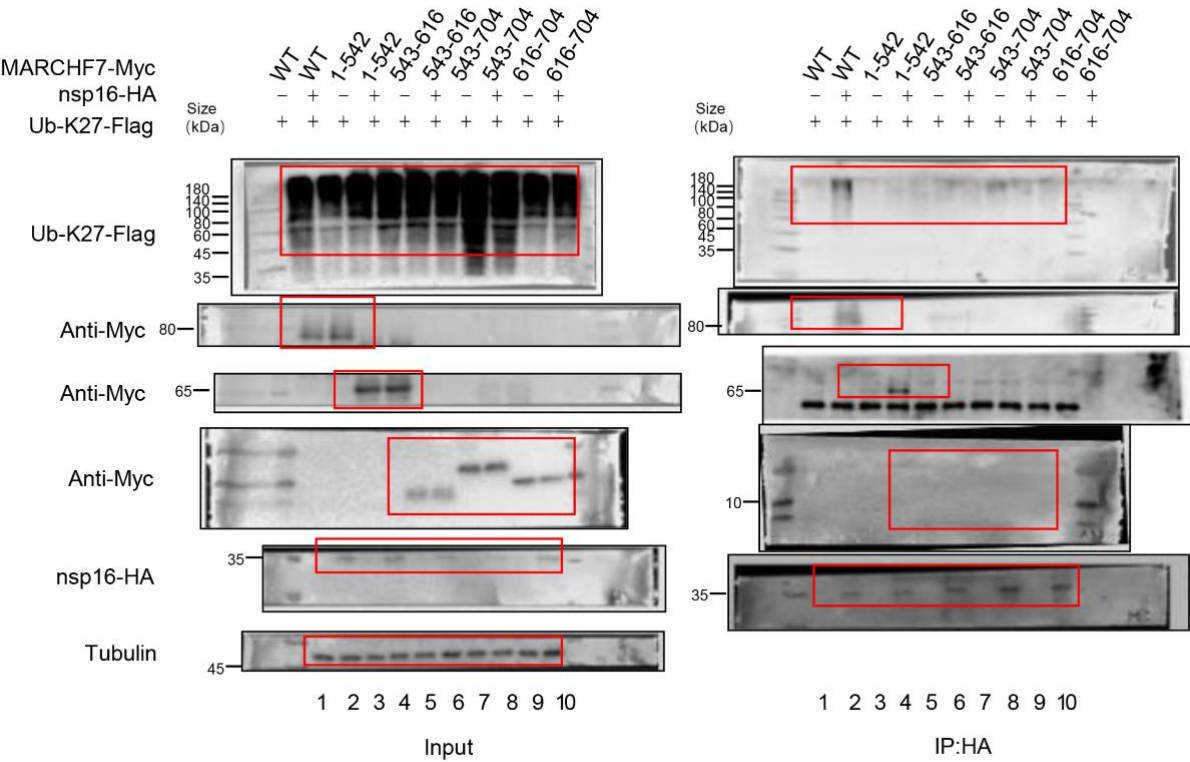

Supplement: fig4-figsupp2-data1 [file elife-102277-fig4-figsupp2-data1-v1.zip]

Figure 4—figure supplement 2E

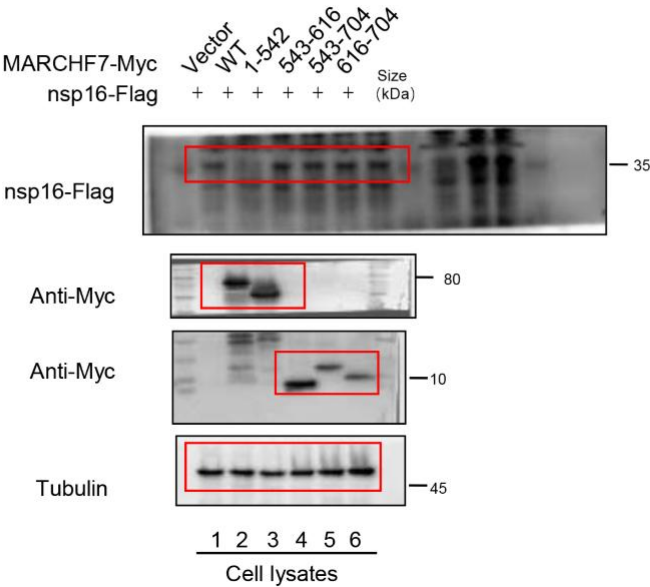

Supplement: fig4-figsupp2-data1 [file elife-102277-fig4-figsupp2-data1-v1.zip]

Figure 4—figure supplement 2C

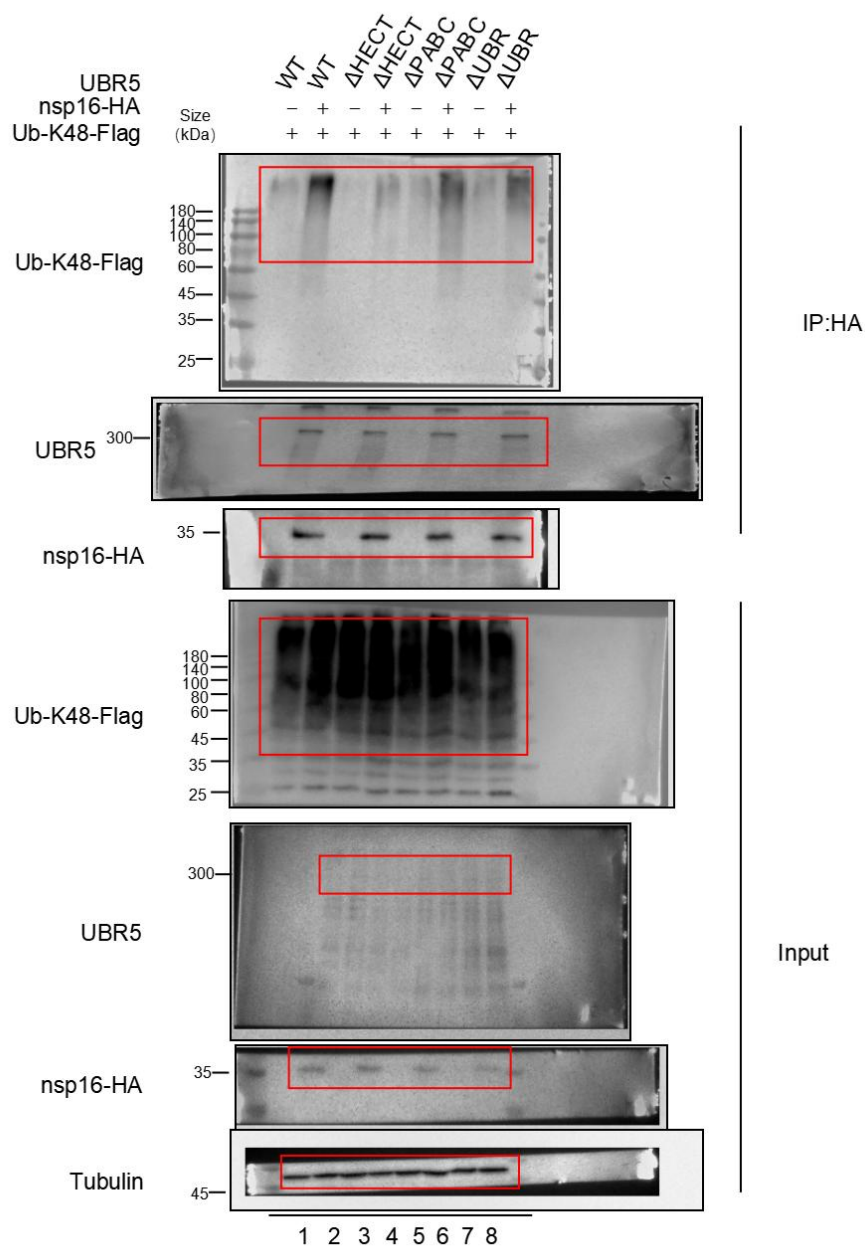

Supplement: fig4-figsupp2-data1 [file elife-102277-fig4-figsupp2-data1-v1.zip]

Figure 5A

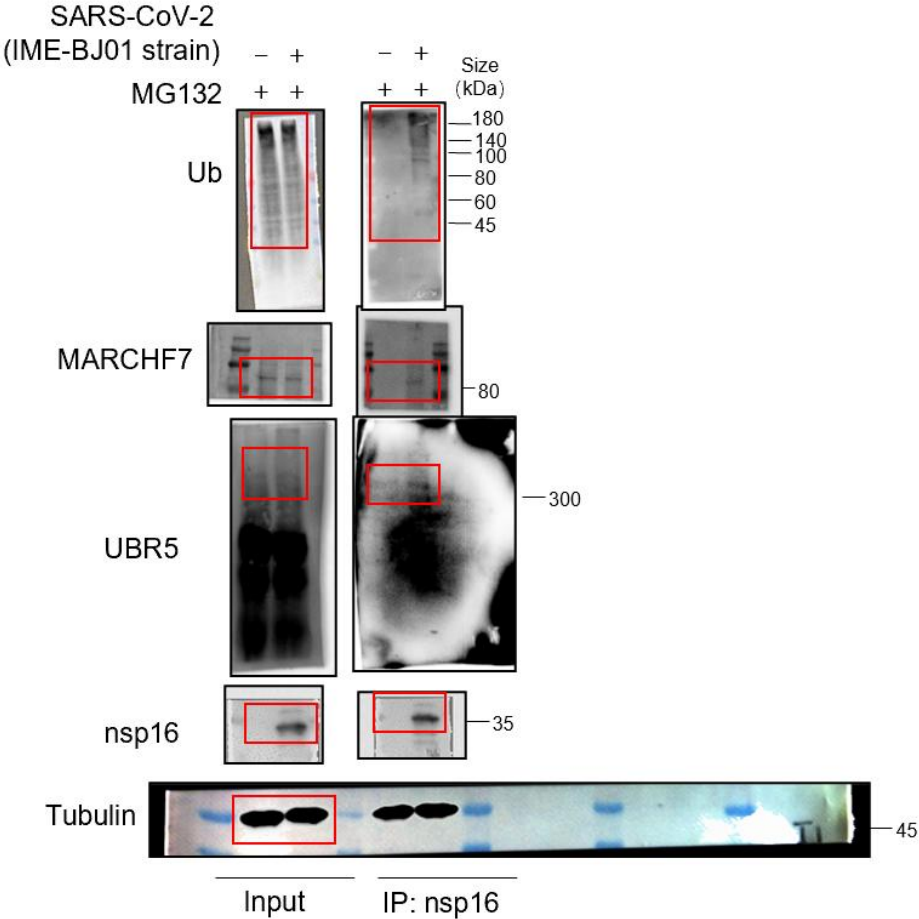

Supplement: fig5-data1 [file elife-102277-fig5-data1-v1.zip]

Figure 5I

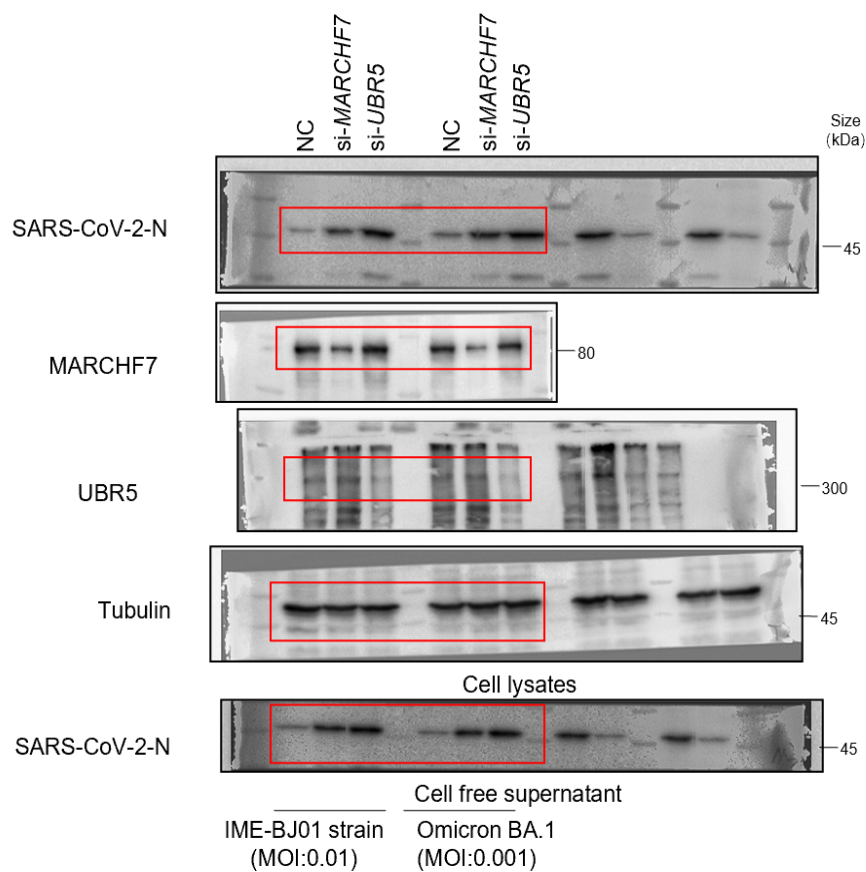

Supplement: fig5-data1 [file elife-102277-fig5-data1-v1.zip]

Figure 6G-H

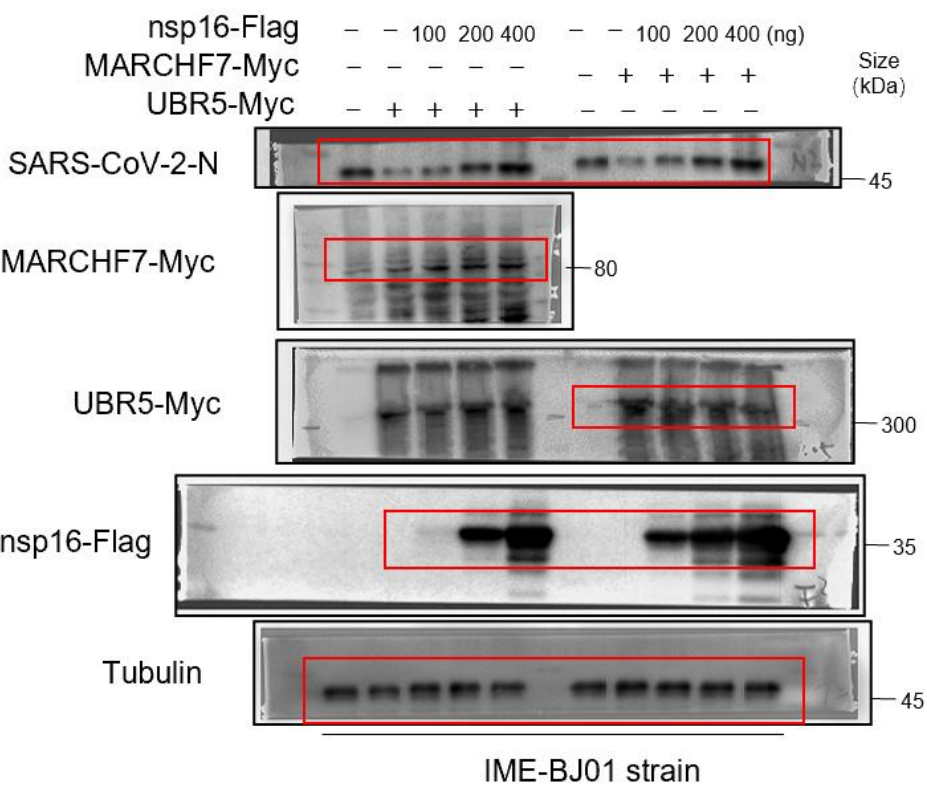

Supplement: fig6-data1 [file elife-102277-fig6-data1-v1.zip]

Figure 6—figure supplement 2G-H

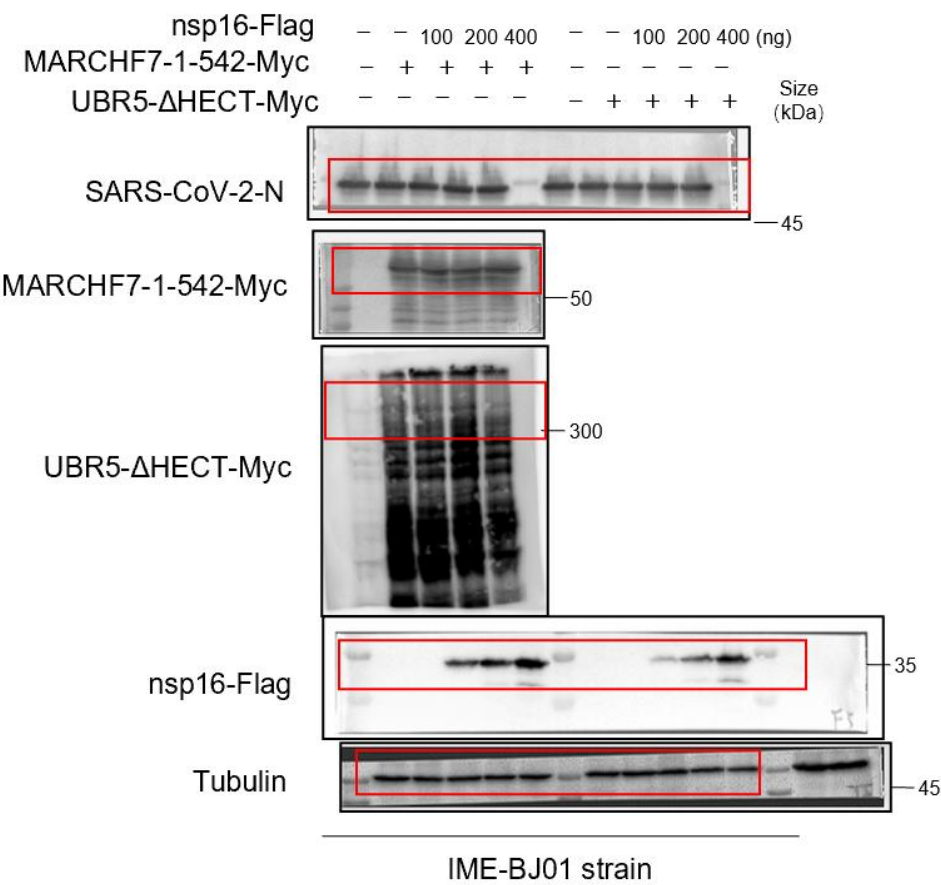

Supplement: fig6-figsupp2-data1 [file elife-102277-fig6-figsupp2-data1-v1.zip]

Figure 6—figure supplement 3B

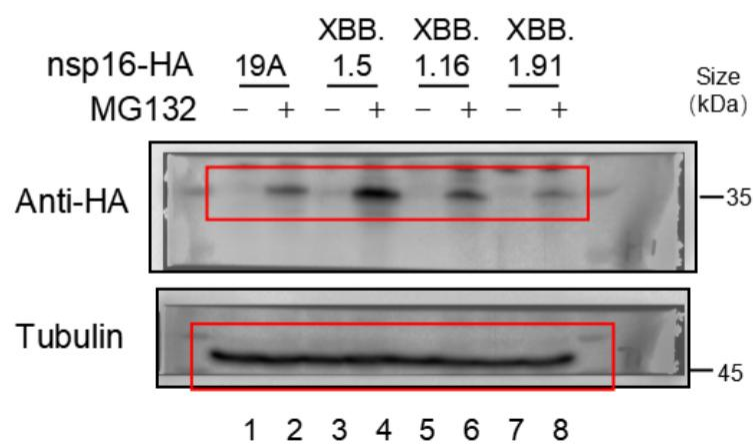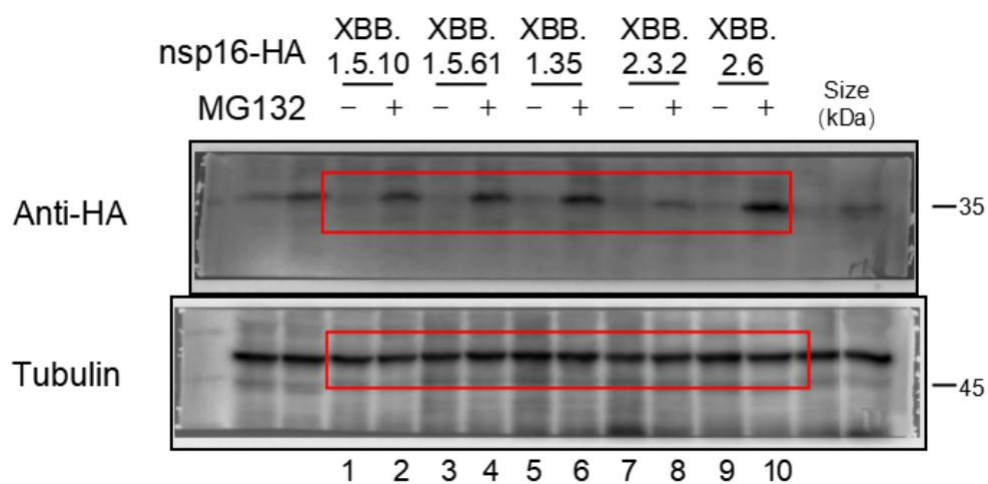

Supplement: fig6-figsupp3-data1 [file elife-102277-fig6-figsupp3-data1-v1.zip]

Figure 6—figure supplement 3C

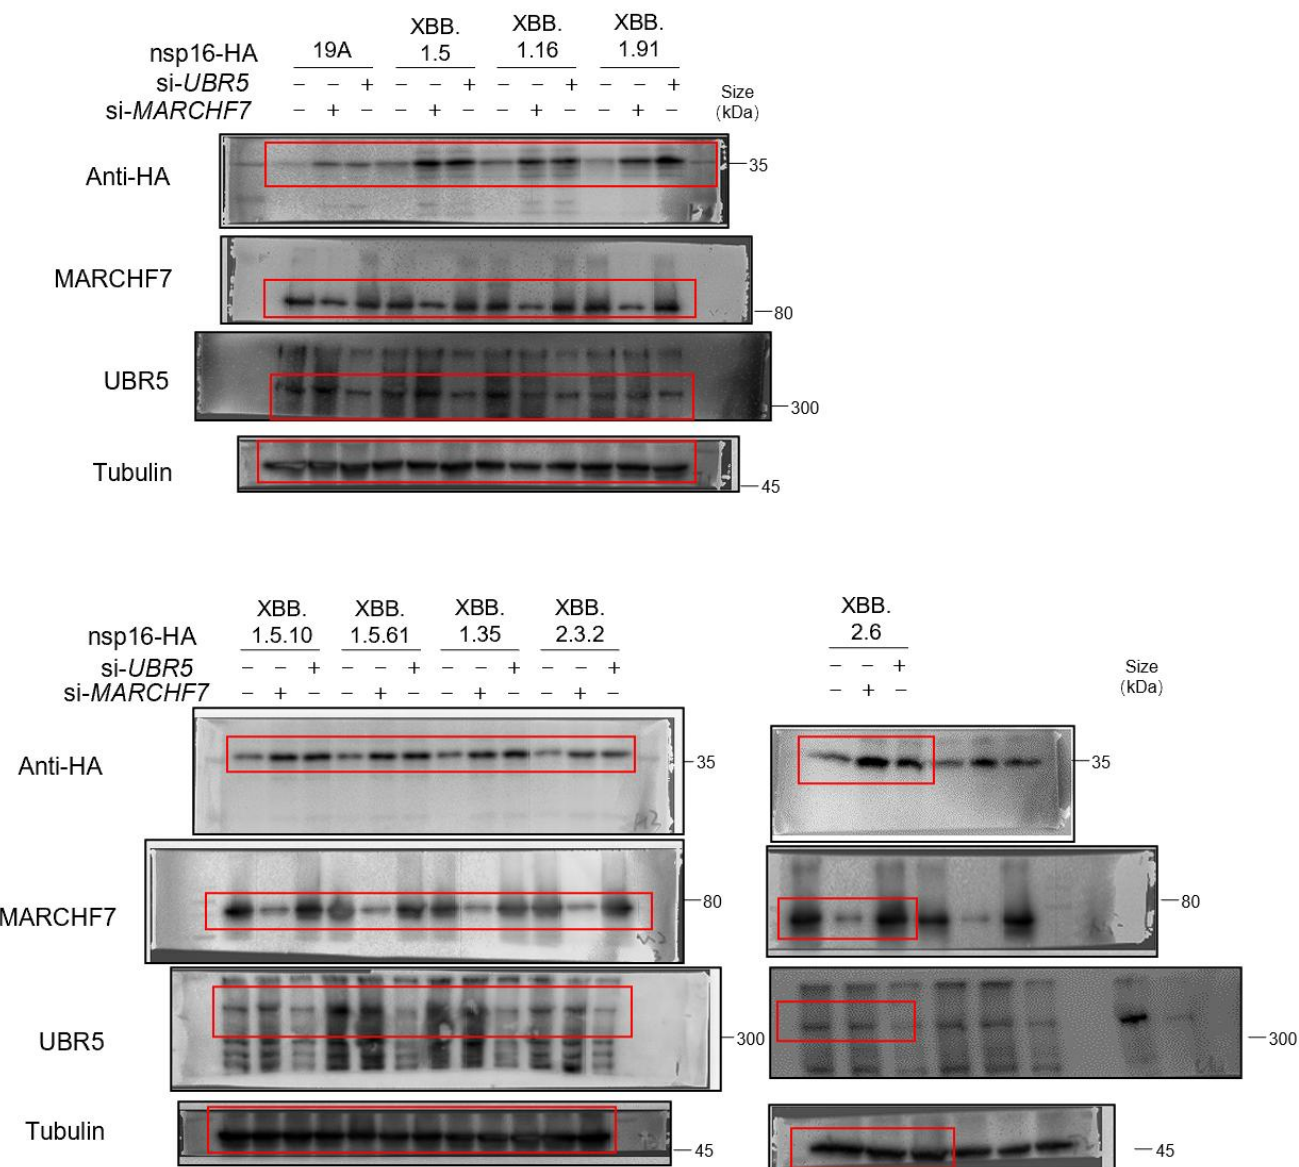

Supplement: fig6-figsupp3-data1 [file elife-102277-fig6-figsupp3-data1-v1.zip]

Figure 6—figure supplement 4C

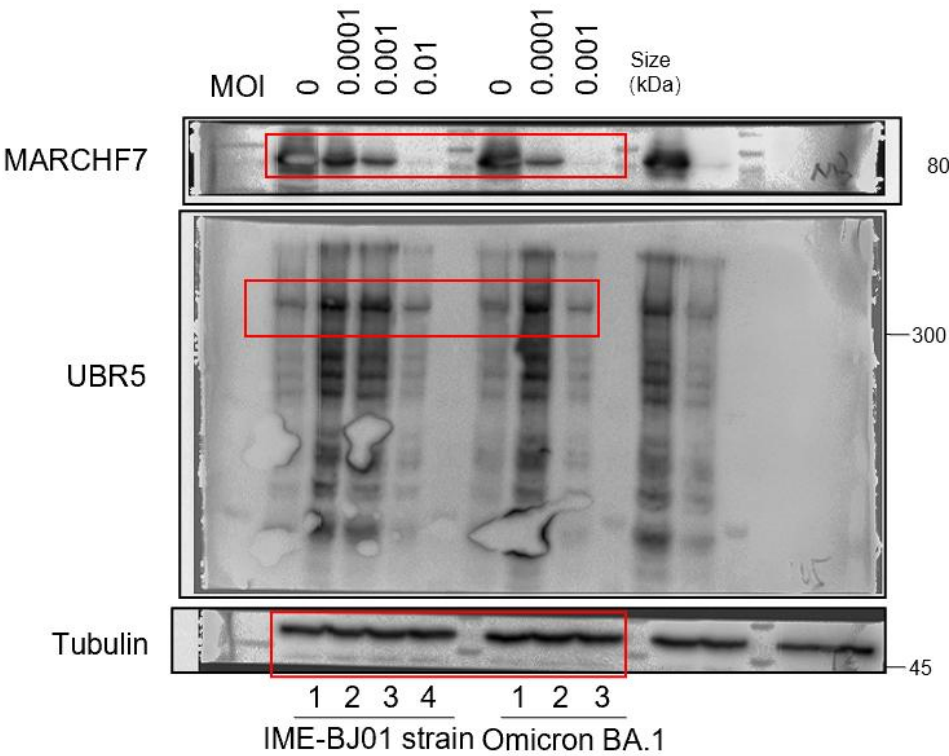

Supplement: fig6-figsupp4-data1 [file elife-102277-fig6-figsupp4-data1-v1.zip]

Figure 7B

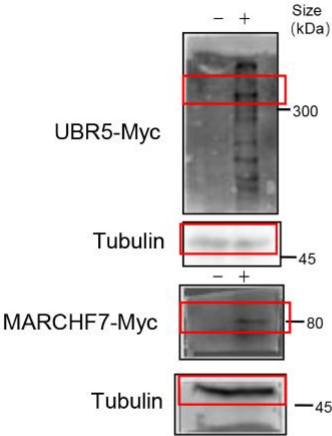

Supplement: fig7-data1 [file elife-102277-fig7-data1-v1.zip]
